## Metabolic reconstitution by a gnotobiotic microbiota varies over the circadian cycle

### Authors:

- Hoces, Daniel<sup>1</sup>
- Lan, Jiayi<sup>2</sup>
- Wenfei, Sun<sup>3,\*</sup>
- Geiser, Tobias<sup>1</sup>
- Cappio Barazzone, Elisa<sup>1</sup>
- Arnoldini, Markus<sup>1</sup>
- Nowok, Sven<sup>4</sup>
- Macpherson, Andrew J<sup>5</sup>
- Stecher, Bärbel<sup>6,7</sup>
- Zenobi, Renato<sup>2</sup>
- Hardt, Wolf-Dietrich<sup>8</sup>
- Wolfrum, Christian<sup>3</sup>
- Slack, Emma<sup>1,9</sup>

1. Laboratory for Food Immunology, Institute of Food, Nutrition and Health, Department of Health Sciences and Technology, ETH Zürich, 8093 Zürich, Switzerland
2. Laboratory of Organic Chemistry, Department of Chemistry and Applied Biosciences, ETH Zürich, 8093 Zürich, Switzerland
3. Laboratory of Translational Nutrition Biology, Institute of Food, Nutrition and Health, Department of Health Sciences and Technology, ETH Zürich, 8603 Schwerzenbach, Switzerland
4. ETH Phenomics Center, Department of Biology, ETH Zürich, 8093 Zürich, Switzerland

5. Department of Biomedical Research, Gastroenterology & Mucosal Immunology, University of Bern, 3010 Bern, Switzerland
6. Max-von-Pettenkofer Institute, LMU Munich, Munich, Germany
7. German Center for Infection Research (DZIF), partner site LMU Munich, 80539 Munich, Germany
8. Institute of Microbiology, Department of Biology, ETH Zürich, 8093 Zürich, Switzerland
9. Corresponding author. Email: [emma.slack@hest.ethz.ch](mailto:emma.slack@hest.ethz.ch)

\*Current affiliation: Stanford University, Department of Bioengineering, CA 94305, USA.

## 1 **SUMMARY**

2 The capacity of the intestinal microbiota to degrade otherwise indigestible diet components is  
3 known to greatly improve the recovery of energy from food. This has led to the hypothesis that  
4 increased digestive efficiency may underlie the contribution of the microbiome to obesity.  
5 OligoMM12-colonized gnotobiotic mice have a consistently higher fat-mass than germ-free or fully  
6 colonized counterparts. We therefore investigated their food intake, digestion efficiency, energy  
7 expenditure and respiratory quotient using a novel isolator-housed metabolic cage system which  
8 allows long-term measurements without contamination risk. This demonstrated that microbiota-  
9 released calories are perfectly balanced by decreased food intake in fully colonized versus  
10 gnotobiotic OligoMM12 and germ-free mice fed a standard chow diet, i.e., microbiota-released  
11 calories can in fact be well-integrated into appetite control. We also observed no significant  
12 difference in energy expenditure per gram lean mass between the different microbiota groups,  
13 suggesting that cumulative very small differences in energy balance, or altered energy storage  
14 must underlie fat accumulation in OligoMM12 mice. Consistent with altered energy storage, major  
15 differences were observed in the type of respiratory substrates used in metabolism over the  
16 circadian cycle: in germ-free mice the respiratory exchange ratio was consistently lower than that  
17 of fully colonized mice at all times of day, indicative of more reliance on fat and less on glucose  
18 metabolism. Intriguingly the RER of OligoMM12-colonized gnotobiotic mice phenocopied fully  
19 colonized mice during the dark (active/eating) phase but phenocopied germ-free mice during the  
20 light (fasting/resting) phase. Further, OligoMM12-colonized mice showed a germ-free-like drop in  
21 liver glycogen storage during the light cycle and both liver and plasma metabolomes of OligoMM12  
22 mice clustered closely with germ-free mice. This implies the existence of microbiota functions that  
23 are required to maintain normal host metabolism during the resting/fasting phase of circadian cycle,  
24 and which are absent in the OligoMM12 consortium.

25 **KEYWORDS**

26 Microbiota, Host Metabolism, Gnotobiotic, Circadian rhythm.



## 27 INTRODUCTION

28 The gut microbiota is currently considered a key regulator of host energy metabolism (Sonnenburg  
29 and Bäckhed, 2016). In the absence of a microbiota, mice accumulated less fat (Bäckhed et al.,  
30 2004) and were protected from obesity induced by certain types of high-fat diets (Bäckhed et al.,  
31 2007; Fleissner et al., 2010; Kübeck et al., 2016). Several mechanisms have been proposed to  
32 explain this phenomenon and its relationship to metabolic imbalances (Cani et al., 2019). These  
33 include endocrine regulation of food intake (Goswami et al., 2018; Lin et al., 2012), additional  
34 energy liberated by the microbiota from dietary fibers (Turnbaugh et al., 2006), alterations in bile  
35 acid profiles (Sayin et al., 2013; Yao et al., 2018), inflammatory responses induced by some  
36 members of the microbiota (Caesar et al., 2015) and induction of thermogenesis in adipose tissue  
37 (Krisiko et al., 2020; Li et al., 2019, 2021). However, given the complexity of a complete microbiota  
38 and its interactions with the host, validating any of these theories and identifying causal  
39 relationships remains a major experimental challenge (Harley and Karp, 2012; Walter et al., 2020).

40 Gnotobiotic mice, colonized with a simplified microbiota made up of defined species, have become  
41 a major tool to identify potential mechanisms of interaction between the microbiota and host (Koh  
42 and Bäckhed, 2020; Mallapaty, 2017; Steimle et al., 2021). Such approaches can generate a  
43 mechanistic understanding of how external factors (i.e. diet, infection) act on the different  
44 microbiota members individually and at a community level (Faith et al., 2014; Kovatcheva-  
45 Datchary et al., 2019). A widely used example, the OligoMM12, is a gnotobiotic consortium of 12  
46 cultivable mouse-derived strains representing the major five bacterial phyla in the murine gut  
47 (Brugiroux et al., 2016). It is reproducible between facilities (Eberl et al., 2020) and extensive data  
48 now exists on the metabolism of individual species and their metabolic interactions with each other  
49 (Streidl et al., 2021; Weiss et al., 2021; Wotzka et al., 2019; Yilmaz et al., 2021). Understanding  
50 how, and to what extent, this gnotobiotic microbiota reconstitutes the metabolic phenotype of  
51 conventional mice is therefore of broad relevance for microbiota research.

52 Circadian variations in microbiota function adds an extra layer of complexity to metabolic  
53 interactions between the host and the microbiota. Circadian feeding is a major driver of microbiota  
54 composition (Thaiss et al., 2014; Zarrinpar et al., 2014). The luminal concentration of fermentation  
55 products such as short-chain fatty acids (SCFA) shows a dramatic circadian oscillation linked both  
56 to food intake and to intestinal motility (Tahara et al., 2018). Microbiota-derived molecules are  
57 known to influence host nutrient absorption (Wang et al., 2017) and host metabolic gene  
58 expression (Kuang et al., 2019; Thaiss et al., 2016). However, much of our current knowledge is  
59 derived from indirect calorimetry measurements made over a time period shorter than 24h  
60 (Bäckhed et al., 2004; Halatchev et al., 2019; Kübeck et al., 2016; Wostmann et al., 1968).  
61 Measurements of the same host-microbiota system, if taken at different timepoints in the circadian  
62 cycle of metabolism, could therefore be wrongly interpreted as qualitative shifts in microbiota  
63 function. Consequently, to understand the influence of the microbiota on host energy metabolism,  
64 it is key to quantify variation over the full circadian cycle.

65 A challenging aspect of addressing the influence of the OligoMM12 microbiota on host metabolism,  
66 is that long-term experiments require hygiene barrier conditions similar to those required to work  
67 with germ-free mice. In particular, standard metabolic cage systems do not permit maintenance  
68 of an axenic environment and moving mice between the open cages typically used in isolator  
69 systems where such animals are normally bred, to IVC-cage-like systems used for most metabolic  
70 cages, can be associated with stress and behavioral abnormalities (Rabasa and Dickson, 2016).  
71 We have therefore built an isolator-housed metabolic cage system. Based on the TSE  
72 PhenoMaster® system, we can monitor levels of O<sub>2</sub>, CO<sub>2</sub> and hydrogen every 24min for up to 8  
73 cages, across two separate isolators in parallel, while maintaining a strict hygienic barrier. This  
74 way, longitudinal monitoring of metabolism can be carried out over periods of several weeks in  
75 germ-free and gnotobiotic mice.

76 In this study, we applied this system to understand how well gnotobiotic microbiota replicate the  
77 influence of a complex microbiota on host metabolism. We compared the metabolic profile of  
78 germ-free (GF), gnotobiotic (OligoMM12) and conventionally raised mice (specific-opportunistic-  
79 pathogen free, SPF) fed *ad libitum* with standard chow, using isolator-based indirect calorimetry.  
80 Similar to what has been described before (Krisiko et al., 2020; Kübeck et al., 2016), we found no  
81 significant differences in energy expenditure among GF and SPF mice. These results are in  
82 contrast to other work (Bäckhed et al., 2004; Levenson et al., 1969; Li et al., 2019; Wostmann et  
83 al., 1968), but the discrepancies can potentially be explained by the methods applied for  
84 normalizing energy-expenditure data. Germ-free and gnotobiotic mice exhibit extensive water  
85 retention in the cecal lumen which can contribute up to 10% of the total body weight. This water  
86 is metabolically inert but is included in the mass used for normalization in reports where a  
87 difference in energy expenditure is reported (Bäckhed et al., 2004; Levenson et al., 1969; Li et al.,  
88 2019; Wostmann et al., 1968). When accounting for cecal inert mass, no significant difference in  
89 energy expenditure can be found in either germ-free or the gnotobiotic OligoMM12 mouse line. By  
90 calculating consumed calories in food and waste calories in feces, we could replicate earlier  
91 findings that germ-free and gnotobiotic mice are less efficient at extracting calories from standard  
92 mouse chow. However, our calculations demonstrated that this is well-compensated by increased  
93 food intake such that all mice absorb a similar number of calories from food each day. Interestingly,  
94 despite indistinguishable energy expenditure, and indistinguishable energy absorption from food  
95 each day, OligoMM12 mice showed increased fat mass compared to both, germ-free and SPF  
96 mice. Consistent with alterations in energy storage patterns, their circadian patterns of respiratory  
97 exchange ratio (RER) and certain metabolites in liver and plasma, phenocopied SPF mice during  
98 the dark phase, but germ-free mice during the light phase. Our study indicates that a  
99 reductionist/synthetic microbiota can specifically recover microbiota function in the dark (active)  
100 phase, but not in the light (resting/fasting) phase of the circadian cycle. This represents a valuable

- 101 tool for identifying critical microbiota species and functions needed to support healthy host  
102 metabolism throughout the day.

## 103 **RESULTS**

104 To compare to published literature on germ-free and colonized mouse metabolism, we compared  
105 male, adult age-matched (12-14wks old) germ-free (GF), gnotobiotic (OligoMM12) and  
106 conventionally raised (SPF) mice, all bred and raised in flexible-film isolators and with a C57BL/6J  
107 genetic background. Indirect calorimetry measurements were carried out in flexible-film surgical  
108 isolators accommodating a TSE PhenoMaster® system (schematic view in Fig. 1A, picture Fig.  
109 1B). Mice were adapted for between 24-36h to the single-housing condition inside isolator-based  
110 metabolic chambers before data collection. Variations on O<sub>2</sub>, CO<sub>2</sub> and hydrogen, along with food  
111 and water consumption, were recorded every 24 min on each metabolic cage. We could confirm  
112 that germ-free mice maintain their germ-free status over at least 10 days of accommodation in  
113 these cages, via culture-dependent and culture-independent techniques (see Methods).

### 114 **Body composition in GF, OligoMM12 and SPF mice**

115 After 6-12 days of data recording mice were fasted for 4-5 hours and euthanized (approximately  
116 at ZT6 ± 1 hour), and body mass and body composition were measured. As cecal mass (cecal  
117 tissue plus its content) is affected by the colonization status (Wostmann et al., 1968), we first  
118 assessed the cecal mass in GF, OligoMM12 and SPF and its impact on body mass. We found  
119 that cecal mass was inversely correlated to the microbiota complexity, starting at approximately  
120 0.5 g in SPF mice, increasing to around 1.5 g in OligoMM12 mice and reaching 3 g on average in  
121 GF mice (Fig.1C). Note that this represents around 10% of total body mass in GF mice (Suppl.  
122 Fig.1A), which translates into a trend to increased total body mass in GF mice (Fig, 1D). This trend  
123 was completely reverted after removal of the cecum from total mass (Fig. 1E).

124 Measurements of body composition in mice are often performed using EchoMRI, which yields data  
125 on lean, fat and water mass. As we observed that the cecum represented such a large and variable

126 fraction of body mass, we compared EchoMRI read-outs of “lean” and “fat” body mass, before and  
127 after removal of the cecum (Suppl. Fig.1B-G). We found a strong correlation between the total  
128 lean mass measured by EchoMRI with and without the cecum (Suppl. Fig 1B) (Suppl. Fig.1C), i.e.,  
129 cecum removal consistently reduced the lean mass readout by 5 to 10% (Suppl. Fig. 1D).  
130 Therefore, cecum removal has a consistent effect on lean mass across groups. For ease of  
131 comparison to published work, we decided to use lean mass obtained by EchoMRI *before*  
132 *dissection* for definitive energy expenditure calculations. We observed a trend in lean body mass  
133 with GF having a lower lean body mass than SPF mice, and OligoMM12 mice showing an  
134 intermediate phenotype (Fig. 1F). However, we were underpowered to detect a significant  
135 difference between groups, and we estimate that at least 22 mice per group would be needed to  
136 achieve statistical significance by one-way ANOVA if the current group differences are real – a  
137 number that was beyond the scope of the current study.

138 In contrast, EchoMRI fat mass measurements pre- and post-cecum dissection were poorly  
139 correlated in GF mice (Suppl. Fig. 1E) attributable to a variable scoring of cecal content as fat or  
140 water. In GF mice, cecum removal resulted in a decrease in EchoMRI fat mass readout of between  
141 5 to 48% (Suppl. Fig. 1F) We also observed a shift towards *higher* fat mass readings in SPF mice  
142 after cecum removal (Suppl. Fig. 1F and Suppl. Fig. 1G); further highlighting the need for caution  
143 in interpreting EchoMRI readouts for fat mass in mice with major differences in intestinal  
144 colonization. Therefore, we proceeded to directly weigh the fat depots accessible to dissection  
145 (interscapular brown adipose tissue, iBAT; and, inguinal and visceral white adipose tissue, iWAT  
146 and vWAT). There was no significant difference between GF and SPF mice in size of the explored  
147 fat depots; however, OligoMM12 mice accumulated more fat in all explored depots than GF mice,  
148 including more iBAT and vWAT compared to SPF mice (Fig 1G).

#### 149 **Energy metabolism and energy balance in GF, OligoMM12 and SPF mice**

150 Body composition is determined by the quantity of calories absorbed from food, and whether these  
151 calories are directly expended or are stored. Energy expenditure was estimated using  $VO_2$  and  
152  $VCO_2$  readouts (Meyer et al., 2015) and normalized as described before (Mina et al., 2018;  
153 Speakman, 2013; Tschop et al., 2011) using EchoMRI lean body mass and dissected fat mass.

154 In contrast to some previous reports (Bäckhed et al., 2004; Levenson, 1978; Li et al., 2019;  
155 Wostmann et al., 1968), but aligned with others (Krisiko et al., 2020; Kübeck et al., 2016), we found  
156 no significant difference in daily energy expenditure (Fig. 2A and Fig. 2B) or  $VO_2$  (Suppl. Fig. 2A  
157 and Suppl. Fig. 2B) between GF, OligoMM12 and SPF mice after normalization using a regression  
158 model that included lean body mass and total dissected fat mass as predictive variables. This lack  
159 of difference was also observed when light and dark phases were analyzed separately (Fig. 2B  
160 and Suppl. Fig. 2B). “Classical” normalization procedures (dividing by mass) also showed no  
161 difference between groups when lean body mass, or “total body mass after cecum dissection” was  
162 used for normalization of energy expenditure (Fig. 2C and D) or  $VO_2$  (Suppl. Fig. 2C and D).  
163 Unsurprisingly, we did find a significant difference during the dark phase in energy expenditure  
164 (Fig. 2E) and  $VO_2$  (Suppl. Fig. 2E) between GF and SPF mice if “total body mass” (i.e., including  
165 the large inert cecum mass in germ-free and gnotobiotic mice) was used for normalization.  
166 Therefore, at least when comparing to the SPF microbiota used in this study, absence of a  
167 microbiota does not result in altered daily energy expenditure in metabolically active tissues.

168 We next investigated increased calorie absorption from food by comparing the daily energy  
169 ingestion from food and calorie excretion in feces of GF, OligoMM12 and SPF mice. The difference  
170 between these two values estimates the absorbed calories. As reported previously (Wostmann et  
171 al., 1983), GF animals ingested on average between 10-20% more standard chow compared to  
172 OligoMM12 and SPF mice (Fig. 2F). Correspondingly, GF animals also excreted a much larger  
173 dry mass of feces, while OligoMM12 mice produced an intermediate fecal mass and SPF mice  
174 excreted the least (Fig. 2G).

175 Remarkably, energy density of dry feces was lower in GF mice (3.7 Kcal/g) compared to colonized  
176 mice (OligoMM12 and SPF, 4.0 Kcal/g); with the latter showing no difference among them (Fig.  
177 2H). This gap between GF and mice with microbiota can likely be explained by the fact that  
178 although fecal bacteria improve energy release from food, a considerable fraction of that energy  
179 remains stored in the bacteria present in the feces. Assuming certain averaged parameters (dry  
180 mass of a bacterium =  $2.26 \times 10^{-13}$ g / bacteria cell (Dennis and Bremer, 2008), density of bacteria  
181 in feces =  $5 \times 10^{11}$  bacteria cells / g of feces (Barlow et al., 2020), and energy stored in bacteria =  
182 4.58 Kcal/g of dry bacteria mass (Popovic, 2019)); we estimated that the fecal microbiota of  
183 colonized mice can contribute approx. 0.52 Kcal/g of dry fecal mass – slightly more than the energy  
184 density difference between fecal energy density in colonized and germ-free mice.

185 We then used these values for food intake, fecal dry mass output, and fecal energy density to  
186 estimate energy absorbed from the feces. We found that the higher food consumption in GF mice  
187 (Fig. 2I) almost perfectly counterbalance their corresponding higher energy excretion in feces (Fig.  
188 2J), such that all mice extract around 9 Kcal per day from their food (Fig. 2K). This is consistent  
189 with our measurements of daily energy expenditure by indirect calorimetry (Fig. 2B), although it  
190 fails to explain the observed adiposity in the OligoMM12 mice (Fig. 1G). Unexpectedly, the  
191 OligoMM12 efficiency of release of calories from chow remains similar between germ-free and  
192 OligoMM12 mice. Given that the gut content of both OligoMM12 and SPF mice is densely  
193 colonized, and the fecal energy density is similar; it should be noted that the lower amount of  
194 energy extracted by the OligoMM12 is not so much due to a poorer digestive capacity of the  
195 gnotobiotic gut microbes, but rather that compared to the SPF microbiota, the calories extracted  
196 by the OligoMM12 microbiota are either retained within the microbes or not converted into  
197 compounds that can be taken up by their host (Fig. 2L).

198 We therefore concluded that daily energy expenditure and daily energy absorption from food vary  
199 only within the range of experimental error intrinsic to indirect calorimetry experiments. At a



200 fundamental level, food intake therefore seems to be well regulated by microbiota-released  
201 calories. Despite this, OligoMM12 mice have an elevated fat mass. It remains a distinct possibility  
202 that gain of fat mass depends on the cumulative effect of very small differences in energy intake  
203 and energy expenditure that are simply not resolvable in our system. An alternative explanation is  
204 that microbiota composition influences energy storage. In order to gain a deeper insight into  
205 underlying mechanisms we carried out a series of more detailed analyses of metabolism.

## 206 **Circadian changes in RER and microbiota-derived hydrogen and short-chain fatty acids** 207 **(SCFA)**

208 Respiratory exchange ratio (RER, the ratio of CO<sub>2</sub> produced per O<sub>2</sub> consumed) is widely used as  
209 an informative proxy for substrate utilization (i.e., glucose or fatty acids) for oxidation in tissues.  
210 We observed that GF mice have a lower RER compared to SPF mice in both light and dark phases,  
211 indicative of increased fat/decreased glucose metabolism in GF mice (Fig 3A). These changes in  
212 RER are not related to differences in feeding patterns as all mice have a similar food intake  
213 patterns during the periods in which their RERs differ the most (Fig. 3B).

214 Differences in RER provided a clue that there could be differences in energy storage in mice with  
215 different microbiota status. Microbial fermentation products, including short-chain fatty acids  
216 (SCFA) and lactate, can be directly used as energy and carbon-sources by the murine host, and  
217 are generated by the microbiota via processes that liberate molecular hydrogen. We therefore  
218 quantified hepatic concentrations of glycogen, and cecal concentrations SCFA, at Zeitgeber 5  
219 (ZT5, 5h into the light phase) and 16 (ZT16, 4h into the dark phase). Hydrogen was measured  
220 continuously during the circadian cycle.

221 Hepatic glycogen levels show a circadian rhythm, which usually peaks early during the transition  
222 between dark to light phase (ZT2-4), and drops to its minimum during the early hours of the dark

223 phase (ZT14-16) in nocturnal rodents (Doi et al., 2010; Ishikawa and Shimazu, 1976). We found  
224 similar accumulation of hepatic glycogen in GF, OligoMM12 and SPF mice at ZT5; however, GF  
225 and OligoMM12 liver glycogen levels drop lower than SPF mice at ZT16 (Fig 3C). This differential  
226 pattern in GF/OligoMM12 compared to SPF mice may indicate that, although they can equally fill  
227 up hepatic glycogen storages at the end of the dark phase, GF and OligoMM12 deplete hepatic  
228 glycogen faster during the light phase.

229 Hydrogen, a byproduct of fiber fermentation by the microbiota, was also measured in the exhaust  
230 air of the metabolic cages. We found a clear circadian pattern in hydrogen production between  
231 OligoMM12 and SPF mice (Fig. 3D). Hydrogen levels in OligoMM12 and SPF mice decreased  
232 down to the limit of blank (GF level as reference) during the light phase, to later peak after food  
233 intake resumes during the dark phase. In addition, OligoMM12 mice showed a higher production  
234 of hydrogen than SPF mice during the dark phase even after regression-based normalization by  
235 cecal mass (Fig. 3D), i.e., the OligoMM12 microbiota produced hydrogen at a higher rate per cecal  
236 content mass than the SPF microbiota.

237 SCFA are the other major output of bacterial fermentation in the large intestine, as well as being  
238 key bioactive compounds produced by the large intestinal microbiota. SPF mice showed the  
239 highest cecal concentrations of acetate, butyrate, and propionate during both the light phase and  
240 dark phase, indicating efficient fermentation (Fig. 3E). Interestingly, OligoMM12 mice showed only  
241 20-50% of the SCFA concentrations observed in SPF mice, but instead showed high production  
242 of lactate during the dark phase (Fig. 3E). In germ-free mice, all analyzed metabolites had levels  
243 below the limit of blank except for lactate, which could correspond to host-produced L-lactate  
244 (Zarrinpar et al., 2018) (our assay is not able to differentiate the enantiomers). As the total mass  
245 of cecum content is widely different among GF, OligoMM12 and SPF mice, we also estimated the  
246 total quantity of each compound in the cecal content by multiplying the concentration (Fig. 3E) by  
247 the cecal mass for each group (Fig. 1C) while propagating the uncertainty of each measurement.

248 This transformation has quite a major impact on how these data can be interpreted: when taking  
249 cecal mass into account, OligoMM12 mice have considerably higher levels of acetate during the  
250 light and dark phase and of propionate during the dark phase than SPF mice, while butyrate levels  
251 remain low. There is also an increased abundance of lactate and succinate in the OligoMM12  
252 cecum content (Fig. 3F). Although we cannot directly link these microbial metabolites to the  
253 phenotype of the OligoMM12 mice, this underlines the major differences in metabolite profiles in  
254 the large intestine when comparing germ-free, gnotobiotic and SPF mice. High lactate production  
255 by the microbiome certainly warrants further study for potential metabolic effects on the host.

### 256 **Circadian changes in liver and plasma metabolites in GF, OligoMM12 and SPF mice**

257 Finally, to increase our metabolic resolution, we applied UPLC-MS to perform untargeted  
258 metabolomics in the liver and plasma during the light (Zeitgeber 5) and dark phase (Zeitgeber 16)  
259 in GF, OligoMM12 and SPF mice. Correlating to what we observed in the RER during the light  
260 phase, GF and OligoMM12 cluster closely and are clearly separated from the SPF in the light  
261 phase of principal component analysis for both liver (Fig. 4A) and plasma samples (Fig. 4B).  
262 However, only minor shifts towards the SPF liver metabolome are seen during the dark-phase for  
263 OligoMM12 liver. This increased separation of the liver metabolome between germ-free and  
264 OligoMM12 mice during the dark-phase, is more apparent when SPF mice are excluded from the  
265 analysis (Suppl. Fig. 3A). Therefore, although RER and glycogen levels clearly show germ-free  
266 like patterns during the light-cycle and SPF-like patterns during the dark-phase, the underlying  
267 metabolome shifts attributable to the microbiome in OligoMM12 mice are subtle, and generally  
268 closer to germ-free signatures than to SPF signatures in both liver (Fig. 4A) or plasma samples  
269 (Fig. 4B).

270 We used the package MetaboAnalystR (Chong and Xia, 2018) to identify putative compounds that  
271 are significantly different in pair comparisons between OligoMM12 mice and their GF and SPF

272 counterparts by untargeted peak extraction. These were then mapped onto metabolic pathways  
273 using the KEGG database. We found several pathways differentially enriched when OligoMM12  
274 mice were compared to GF or SPF counterparts during the light and dark phase in liver (Fig. 4C)  
275 and plasma (Fig. 4D), including amino acid, bile acids, and fatty acid metabolism. Additionally, we  
276 selected compounds that belong to these differentially enriched pathways or have been previously  
277 identified to have circadian changes in obese patients (Nowak, 2021), confirmed their structure  
278 using chemical standards, and performed a targeted peak extraction for a more precise  
279 comparison among groups (Suppl. Table 1). We observed that for many of these metabolites the  
280 OligoMM12 microbiota produce an intermediate phenotype between GF and SPF mice, e.g., a  
281 subset of bile acids and amino acids, in liver (Suppl. Fig 4A) and plasma (Suppl. Fig 4B).

## 282 **DISCUSSION**

283 Since the early days of nutritional studies, there has been a clear interest to understand the role  
284 of microbiota in host morphology, physiology and nutrition (Gordon and Pesti, 1971; Levenson,  
285 1978). Pioneering work comparing germ-free rats with conventionally raised counterparts already  
286 described differences in food intake, energy extraction from diet and energy expenditure by  
287 indirect calorimetry (Levenson et al., 1969; Wostmann et al., 1983). More recently, researchers  
288 have explored the effect of specific complex microbiota communities and how they influence  
289 energy metabolism and body composition in the host (Ridaura et al., 2013; Suárez-Zamorano et  
290 al., 2015; Turnbaugh et al., 2006). Here we extend and clarify some of these observations via use  
291 of a well-established gnotobiotic mouse model consisting of 12 cultivable microbiota strains.

292 By carefully checking the validity of different measurement types, we found no significant  
293 difference in lean body mass among germ-free (GF), gnotobiotic (OligoMM12) and conventionally  
294 raised (SPF) mice. Interestingly, there was a significant increase in fat depots in OligoMM12 mice  
295 compared to GF and SPF animals. Previous studies diverged on the effect of microbiota on fat  
296 mass accumulation during conventional/low-fat diet feeding; reporting either increased fat mass  
297 in SPF mice (Bäckhed et al., 2004) or no difference compared to GF mice (Kübeck et al., 2016).  
298 However, it should be noted that there can be huge differences between SPF microbiota within  
299 and between animal facilities. GF mice transplanted with microbiota derived from obese donors  
300 accumulated more fat mass compared to those transplanted with microbiota derived from lean  
301 donors (Halatchev et al., 2019; Ridaura et al., 2013; Turnbaugh et al., 2006), with correlates  
302 identified to individual species/strain abundance (Woting et al., 2014, 2015). SPF microbiota  
303 matching more closely to those from obese donors could therefore be expected to give differing  
304 results to ours. In contrast, minimal microbiota communities such as the OligoMM12 can be  
305 perfectly replicated across sites (Eberl et al., 2020), and can help to clarify the complex processes  
306 linking microbiota and host metabolism (Becker et al., 2011). Further exploration of the metabolic

307 effects of the OligoMM12 microbiota community, and extended versions thereof, has potential to  
308 clarify if specific strains, species or functional classes (Schmidt et al., 2018) are sufficient and  
309 necessary to drive the development of increased fat depots in these mice.

310 We further observed no significant difference in energy expenditure in GF, OligoMM12 and SPF.  
311 This was critically dependent on the mass normalization procedure applied. Normalization of  
312 mass-dependent variables by a per-mass (or allometric transformation) ratio has been recognized  
313 as a common source of controversy (Packard and Boardman, 1999; Tanner, 1949; White and  
314 Seymour, 2005), especially with large changes in body mass composition (Butler and Kozak,  
315 2010; Kaiyala and Schwartz, 2011), and there have been several publications calling for the use  
316 of better statistical methods (Arch et al., 2006; Fernández-Verdejo et al., 2019; Tschop et al.,  
317 2011). Water- and indigestible solute retention in the cecum lumen of germ-free and gnotobiotic  
318 mice can contribute up to 10% of the total body mass and should be considered metabolically  
319 inert. It is therefore unsurprising that when the cecal content mass is very different among groups,  
320 using total body mass for normalization introduces a considerable bias in normalized energy  
321 expenditure estimation. Interestingly, it was long-ago observed that surgical removal of the cecum  
322 equalized the oxygen consumption between germ-free and conventional rats; as well as other  
323 measurements normalized by total body mass (Wostmann et al., 1968). With normalization using  
324 linear regression models based on lean-mass and fat-mass (Mina et al., 2018), we and others  
325 found no significant differences in energy expenditure by indirect calorimetry between GF and  
326 SPF mice under standard chow diet conditions (Krisiko et al., 2020; Kübeck et al., 2016; Li et al.,  
327 2021).

328 An additional important confounder that we encountered was high variability of fat mass readouts  
329 obtained by EchoMRI when comparing mice with major differences in intestinal colonization levels.  
330 This could be attributed to variable calling of the fluid-filled ceca of gnotobiotic animals as either  
331 fat or water, compared with more accurate calling in conventional mice, revealing an important

332 limitation of these systems. Consequently, physically dissected fat mass provided a more accurate  
333 read-out in all of these studies.

334 We are also keen to point out the more general limitations of our observations: only one gnotobiotic  
335 microbiota and one SPF microbiota were analyzed, and our conclusions pertain exclusively to  
336 these. We in no way exclude the possibility that some microbiota constituents or conformations  
337 *can* influence host energy expenditure (Halatchev et al., 2019) and/or body composition (Ridaura  
338 et al., 2013; von Schwartzberg et al., 2021; Turnbaugh et al., 2006). In addition, it should be  
339 noted that indirect calorimetry is an inherently noisy data type, and small differences in daily  
340 energy expenditure are impossible to resolve via this technique (Corrigan et al., 2020; Fernández-  
341 Verdejo et al., 2019).

342 Nevertheless, the lack of measurable difference in energy expenditure between GF, OligoMM12  
343 and SPF mice is aligned with our finding that the amount of energy obtained by *ad libitum* food  
344 intake was also remarkably similar among the groups. GF mice seem to accurately compensate  
345 the lower capacity of energy extraction from diet by increasing food intake. While this seems  
346 generally to be in agreement with models that described the regulation of appetite (and therefore  
347 energy intake) by the basal energy requirement of the individual (MacLean et al., 2017; Stubbs et  
348 al., 2018), it remains surprising given the discrepancy in the types of substrates available for  
349 oxidative metabolism in colonized and germ-free mice, revealed by RER differences. Although  
350 germ-free mice have a longer total gastrointestinal transit time than SPF mice (Touw et al., 2017),  
351 very little calorie absorption from food can occur after ingested food reaches the cecum of a germ-  
352 free mouse, whilst an SPF mouse will release usable energy from their food via microbial  
353 fermentation for several more hours in the cecum and colon, generating a major time-difference  
354 in the absorption of calories after eating in germ-free and SPF animals. This compensation seems  
355 also to function in mice colonized with the OligoMM12 microbiota, where despite robust microbial  
356 fermentation (read out as hydrogen and fermentation product production) and identical fecal

357 energy density to SPF mice, energy recovery from ingested food is poor due to the volume of  
358 feces shed. A clear conclusion from these observations is that microbiota-dependent changes in  
359 metabolic substrates, and timing of calorie absorption, are well integrated in the murine central  
360 regulation of appetite over the course of a day (Fetissov, 2017).

361 Despite this broadly successful regulation of food intake and energy expenditure, at the molecular  
362 level, major differences were observed between the mice with different microbiota. First,  
363 OligoMM12 mice displayed an RER at the GF level during the light phase (when mice typically  
364 sleep and fast) but raised up to SPF levels during the dark phase (i.e., when mice are active and  
365 eating). It therefore appears that the OligoMM12 microbiota better recapitulates the microbiome  
366 effects on the host energy substrate use during the dark (active) phase when food-derived  
367 carbohydrates are abundant in the large intestine, but not in the light (sleeping) phase when mainly  
368 host-derived carbon sources are available in the large intestine. This potentially correlates with  
369 the SCFA concentrations observed in the cecum content of the OligoMM12, which was associated  
370 with a predominance of succinate and lactate, at the expense of propionate and butyrate. In  
371 complex microbiotas, lactate is typically further metabolized to butyrate by specific firmicutes  
372 (Belenguer et al., 2011; Duncan et al., 2004; Flint et al., 2015), which may be lacking or  
373 insufficiently abundant in the OligoMM12 mice. As lactate can inhibit lipolysis in adipocytes (Cai  
374 et al., 2008; Liu et al., 2009), this raises an interesting theme for follow-up studies to define the  
375 role of microbiota-derived lactate in host metabolism. In line with the RER data, we also observed  
376 that the liver and plasma metabolite profiles of OligoMM12 mice clustered closer to GF mice than  
377 to SPF mice. Although a small shift in the liver metabolome could be observed in the OligoMM  
378 liver during the dark cycle, this clearly demonstrates major metabolic effects of a complete  
379 microbiota that are not reconstituted by the OligoMM12 strains. In addition, certain amino acids  
380 were differentially represented between OligoMM12 and GF or SPF mice, as it has been described  
381 previously (Claus et al., 2008; Mardinoglu et al., 2015). Interestingly, OligoMM12 had a bile acid



382 profile closer to GF than SPF mice, for example showing GF-levels of hepatic  $\beta$ -murocholic acid  
383 and taurine-  $\beta$ -murocholic acid, the predominant bile acid in the liver of GF mice (Sayin et al.,  
384 2013). Follow up studies with manipulation of the OligoMM12 microbiota or metabolic interventions  
385 are a promising tool to pull apart the circadian effects on RER, the influence of an unusual  
386 fermentation product profile, and other more subtle metabolic changes on overall metabolic health  
387 of the murine host.

388 In conclusion, our study showed that isolator-based indirect calorimetry is possible and allows  
389 detailed analysis of the metabolism of germ-free and gnotobiotic mice in real-time. Data generated  
390 with this system demonstrated that microbiota-released calories are well integrated in host energy  
391 balance, and that daily energy expenditure was not significantly influenced by microbiota  
392 composition in our mice. Nevertheless, mice colonized with the OligoMM12 gnotobiotic microbiota  
393 accumulated more fat mass and display a GF-like RER during the light phase but an SPF-like  
394 RER during the dark phase, indicative of altered metabolic substrate usage and energy storage.  
395 Correspondingly, the liver metabolome of mice colonized with the OligoMM12 showed alterations  
396 in bile acid, fatty acid and amino acid metabolism, despite overall clustering with the GF liver  
397 metabolome. This reveals the potential for gnotobiotic microbiota communities to investigate the  
398 mechanisms underlying the influence of microbiota on host metabolic health. As microbial  
399 dysbiosis is associated with a range of human diseases, circadian analysis of energy balance  
400 represents a crucial tool in the mining of microbiome data for therapeutic and diagnostic purposes.

## 401 **METHODS**

### 402 **Animals**

403 We used C57B6/J male mice aged between 12-14 weeks. We compare germ-free mice (GF), with  
404 a 12-strain gnotobiotic microbiota (Brugiroux et al., 2016) (OligoMM12) and specific-pathogen free  
405 mice (SPF). GF and OligoMM12 mouse lines are bred and maintained in open-top cages within  
406 flexible-film isolators, supplied with HEPA-filtered air, and autoclaved food and water ad libitum.  
407 As we are aware that housing conditions may influence behavior and potentially metabolism, we  
408 also bred and maintained a SPF colony under identical conditions inside a flexible-film isolator  
409 specifically for this study, such that all mice experienced identical living conditions, food, and water.  
410 Mice were adapted for between 24-36h after transfer from the breeding isolators to the isolator-  
411 based metabolic chambers. For long term experiments, mice were periodically re-housed in  
412 couples for short periods of times to avoid stress of extended single-housing conditions. In all  
413 cases, animals were maintained with standard chow (diet 3807, Kliba-Nafag, Switzerland) and  
414 autoclaved water. Germ-free status was confirmed at the end of the long-term experiments by  
415 culturing cecal content in sterile BHIS media in aerobic and anaerobic conditions for a week. In  
416 addition, cecal content was frozen at -20°C for a week, then stained with SYBR Gold and assessed  
417 by bacterial flow cytometry (Moor et al., 2016) using similarly processed SPF mice cecal content  
418 as positive control for the presence of bacteria. All experiments were conducted in accordance  
419 with the ethical permission of the Zürich Cantonal Authority.

### 420 **Indirect calorimetry**

421 The isolator-housed TSE PhenoMaster® system allows instantaneous measurements of oxygen,  
422 carbon dioxide and hydrogen levels as well as total feed and water consumption while keeping a  
423 strict hygiene level of control. The metabolic isolator system consists of an adapted set of two

424 flexible-film surgical isolators, each of them housing four metabolic cages from the TSE  
425 PhenoMaster® system (TSE Systems, Germany). Room air is pulled into the isolator by a vacuum  
426 pump passing through a double set of HEPA filters. Then, each cage is connected via a second  
427 HEPA filter through the back wall of the isolator to the CaloSys setup, which pulls sterile air from  
428 the isolator into the cages using negative pressure. Air coming from the cages is dehumidified at  
429 4°C and sequentially passed by a Sensepoint XCD Hydrogen gas analyzer (Honeywell Analytics,  
430 Hegnau, Switzerland) and standard oxygen and carbon dioxide sensors provided in the TSE  
431 PhenoMaster® system. A two-point calibration of all analyzers using reference gases was  
432 performed within 24 h before each animal experiment. Data was recorded using a customized  
433 version of the TSE PhenoMaster® software modified to integrate hydrogen measurements.

434 For indirect calorimetry measurements, the animals were transported in pre-autoclaved, sealed  
435 transport cages from the breeding isolators into the metabolic isolator system. Mice were single  
436 housed and adapted for between 24-36h before starting recording measurements to ensure  
437 proper access to food and water as well as account for initial exploratory behavior. Mice were kept  
438 up to 10 days at a stable temperature (21-22°C) with *ad libitum* availability of standard chow and  
439 water. The days were divided into a dark and light period of 12 hours each. In this study, we kept  
440 the air flow of 0.4 L/min and recorded individual cage data (gases production and food/water  
441 consumption) every 24min (time set per cage for measurement stabilization 2.5min). In long  
442 experiments, mice were periodically pair-housed for 24h to prevent stress due to prolonged single  
443 housing.

#### 444 **Body composition measurements**

445 At the end of the experiment, mice were fasted for 4 hours (Zeitgeber 1 till 5) before for body  
446 composition measurements. We used magnetic-resonance whole-body composition analyzer  
447 (EchoMRI, Houston, USA) to analyze mice body composition (lean and fat mass). Then, mice

448 were euthanized using CO<sub>2</sub> according to approved protocols. Total body mass was obtained by  
449 weighing the full carcass and cecum was dissected and weighed by one investigator (DH). For a  
450 set of mice, we remeasured body composition by EchoMRI after cecum removal. Finally, fat  
451 depots were dissected from all mice by one investigator (W.S.) that was blinded to the hygiene  
452 status of the mice. Interscapular brown adipose tissue (iBAT), inguinal white adipose tissue (iWAT)  
453 and visceral white adipose tissue (vWAT) were sampled and weighted.

#### 454 **Food intake, fecal samples and bomb calorimetry**

455 Daily food intake was obtained as the mean value of food intake recorded by the TSE  
456 PhenoMaster® system during the course of the experiment. In addition to the mice reported in the  
457 indirect calorimetry experiments, we also collected food intake data from a set of selected  
458 experiments in which we collected fecal pellets produced during 24h. For daily fecal excretion  
459 measurements, we cleaned up the bedding in the cage and replaced it for a clean and reduced  
460 amount of bedding. After 24h, we collected the mix of bedding and fecal pellets. Fecal pellets were  
461 manually collected from the bedding, transferred to 15ml tubes and stored at -20°C until bomb  
462 calorimetry. Before bomb calorimetry, fecal samples were freeze dried in a lyophilizer overnight  
463 (ALPHA 2-4 LDplus, Christ, Germany) and dry mass recorded. We used a C1 static jacket oxygen  
464 bomb calorimeter (IKA, Germany) to quantify the residual energy present in these dry fecal pellets,  
465 using approximately 0.2-0.5g of material. Energy content was normalized to grams of dry fecal  
466 pellets.

#### 467 **Metabolomics by UPLC/MS**

468 *Sample obtention and preparation*

469 Approximately at Zeitgeber 5 and 16, three mice of each group were euthanized, and liver and  
470 plasma samples collected. To minimize variations among mice, individual mice were euthanized  
471 with CO<sub>2</sub> and sampled as fast as possible. Blood was obtained by cardiac puncture, collected in  
472 lithium heparin coated tubes, and kept on ice for further processing. Mice were perfused with PBS  
473 and liver samples were obtained by dissection of the lower right lobe, collected on an 2ml  
474 Eppendorf tube and flash frozen in liquid nitrogen. Finally, between 60-80 mg of cecal content was  
475 collected in a 2ml Eppendorf tube and flash frozen in liquid nitrogen. After samples all samples  
476 were obtained, blood samples were centrifuged 8000rcf for 5min, supernatant collected, and flash  
477 frozen in liquid nitrogen. Samples were kept at -80°C until preparation for UPLC/MS.

#### 478 *Short chain fatty acid quantification by UPLC/MS*

479 Samples were first homogenized in 70%-isopropanol (1 mL per 10 mg sample), centrifuged.  
480 Supernatants were used for SCFA quantification using a protocol similar to previously described  
481 (Liebisch et al., 2019). Briefly, a 7-points calibration curve was prepared. Calibrators and samples  
482 were spiked with mixture of isotope-labeled internal standards, derivatized to 3-  
483 nitrophenylhydrazones, and the derivatization reaction was quenched by mixing with 0.1% formic  
484 acid. Four µL of the reaction mixture was then injected into a UPLC-MS system, [M-H]<sup>-</sup> peaks of  
485 the derivatized SCFAs were fragmented and characteristic MS<sub>2</sub> peaks were used for  
486 quantification.

#### 487 *Untargeted UPLC/MS*

488 Samples were thawed on ice. Serum samples were diluted with 90% methanol in water with a  
489 volumetric ratio of 1:7, incubated for 10 min on ice for allowing protein to precipitate. Liver samples  
490 were mixed with 75% methanol in water (2 mL/ 100 mg liver), homogenized using a TissueLyser  
491 (Qiagen, Germany) at 25 Hz for 5 min. The result mixtures were centrifuged at 15,800 g, 4 °C for

492 15 min. 100  $\mu$ L of the supernatants were filtered with 0.2  $\mu$ m reversed cellulose membrane filter  
493 and transferred to sample vials and used for UPLC/MS analysis with an ACQUITY UPLC BEH  
494 AMIDE column (1.7  $\mu$ m, 2.1  $\times$  150 mm, Waters). Another 400  $\mu$ L of the supernatants were then  
495 lyophilized and resuspended in 80  $\mu$ L 5% methanol in water, sonicated, filtered, and used for  
496 UPLC/MS analysis with an ACQUITY UPLC BEH C18 column (1.7  $\mu$ m, 2.1  $\times$  150 mm, Waters,  
497 RP column).

498 An ACQUITY UPLC system (I-Class, Waters, MA, USA) coupled with an Orbitrap Q-Exactive Plus  
499 mass spectrometer (Thermo Scientific, San Jose, CA) were used for UPLC/MS analysis. For the  
500 AMIDE column a flow rate of 400  $\mu$ L/min was used with a binary mixture of solvent A (water with  
501 0.1% formic acid) and solvent B (acetonitrile with 0.1% formic acid). The gradient starts from 1%  
502 of A, then gradually increases to 70% of A within 7 min. Then a 1% of A is kept for 3 min. The  
503 column was kept at 45  $^{\circ}$ C and the autosampler at 5 $^{\circ}$  C.

504 For the RP column, the flow rate was set to 240  $\mu$ L/min using a binary mixture of solvent A (water  
505 with 5 % methanol and 0.1 % formic acid) and solvent B (methanol with 0.1 % formic acid). The  
506 gradient starts from 95% of A, then gradually decreases to 5% of A within 10 min. A 100% solvent  
507 of B is kept for 2 min, then a 100% of A is kept for 2min to restore the gradient. The column was  
508 kept at 30  $^{\circ}$ C and the autosampler at 5  $^{\circ}$ C.

509 The MS was operated at a resolution of 140,000 at  $m/z$  = 200, with automatic gain control target  
510 of  $2 \times 10^5$  and maximum injection time was set to 100ms. The range of detection was set to  $m/z$  50  
511 to 750. Untargeted MS data was extracted from raw MS files by using XCMS (Smith et al., 2006)  
512 in R (v3.6.1), and then subject to pathway enrichment by using MetaboAnalystR (Chong and Xia,  
513 2018).

514 *Compound identification and targeted peak extraction*

515 Chemical standards of selected compounds were diluted to 10 µg/mL and were analyzed using  
516 the UPLC/MS methods described before. Identification was done by comparing retention time and  
517 MS2 in liver/plasma samples with the chemical standards (Nowak, 2021). After confirming the  
518 chemical identities of the compounds, targeted peak extraction was done using Skyline (v21.1)  
519 (Adams et al., 2020).

## 520 **Data Analysis**

### 521 *Data quality control*

522 To facilitate analysis across different experimental runs, all times were converted into Zeitgeber  
523 time (ZT; [h]), where 0-12 represents the light phase and 12-24 represents the dark phase. Any  
524 datapoint taken before the start of the first occurrence of ZT=0 was discarded. To account for  
525 faulty measurements caused by measurement imprecision, equipment malfunction or other  
526 disruptive events, datapoints were removed from the raw datasets according to criteria based on  
527 statistical and biological arguments. Food consumption values of 0.01 g during the 24min intervals  
528 were considered as measurement noise and discarded. Negative values for food and water  
529 consumption, as well as oxygen (dO<sub>2</sub>) and carbon dioxide (dCO<sub>2</sub>) differentials between the  
530 measurement chambers and the reference chamber were also considered as measurement noise  
531 and discarded. For the remaining subsets of measurements from the individual mice, we cleaned  
532 up outlier measurements in food and water intake by eliminating values greater than 75<sup>th</sup> percentile  
533 + 1.5 times interquartile range. Potential sources for outlier measurements in food and water  
534 consumption observed included leaky water bottles and loss of food pellets during mice husbandry  
535 procedures. A similar approach was used to eliminate outliers from dO<sub>2</sub> and dCO<sub>2</sub> values below  
536 25<sup>th</sup> percentile - 1.5 times interquartile range. Potential sources for outlier measurements in gas  
537 differentials included inappropriate sealing of individual metabolic cages or clogging of pre-  
538 analyzer filters. Oxygen consumption (VO<sub>2</sub>) and CO<sub>2</sub> production (VCO<sub>2</sub>) was calculated using dO<sub>2</sub>

539 and  $dCO_2$  and the Haldane transformation as described before (Arch et al., 2006). Energy  
540 expenditure was estimated from  $dO_2$  and  $dCO_2$  using Weir's approximation (Weir, 1949). As one  
541 of the study objectives is to explore circadian patterns, if more than 20% of datapoints had to be  
542 removed from a particular day for a particular mouse, all other datapoints from that subset were  
543 discarded as well. After the cleanup process described above, the data from all different  
544 experiment runs were pooled together for further analysis. The above processes lead to a  
545 reduction in dataset size from 10472 to 9453 entries.

#### 546 *Statistical analysis*

547 From the resulting dataset, energy expenditure over a certain period was calculated as the area  
548 under the curve (trapezoid interpolation) of instantaneous values obtained during the 24min  
549 measurements intervals. Food intake values calculated over a certain time are always cumulative.  
550 To compare different mice in the above variables, variations in body mass and composition  
551 between individuals need to be accounted for. As suggested in several publications (Fernández-  
552 Verdejo et al., 2019; Speakman, 2013; Tschop et al., 2011), this was done by regression-based  
553 analysis of covariance (ANCOVA). As such, a linear regression is performed on energy  
554 expenditure as a function of lean body mass and fat depots mass, with the microbiota group as a  
555 qualitative covariate. Then, each individual value is replaced by the sum of the corresponding  
556 residual and the energy expenditure predicted by the linear model using the average lean body  
557 and fat depot mass (calculated over all groups). Hydrogen production (difference in hydrogen  
558 concentration between the measurement chambers and the reference chamber) was adjusted in  
559 analogous fashion, using cecal mass (as a proxy for total gut microbiota mass) as a predictor.

560 For variables where the continuous evolution during the circadian cycle is of interest (RER, gross  
561 hydrogen production), values were averaged at each time point for each individual. A generalized



562 additive model was used to fit a smooth line to these averages using a cubic penalized regression  
563 spline (using R function `mgcv::gam` with formula  $y \sim s(x; bs = "cs")$ ).

564 For estimating derived variables (i.e., daily energy excretion) we used the R package “errors”  
565 (Ucar et al., 2019). This package links uncertainty metadata to quantity values (i.e., mean “daily  
566 fecal dry mass excretion”, mean “fecal energy content”) and this uncertainty is automatically  
567 propagated when calculating derived variables (i.e., “daily energy excretion” = “daily fecal dry  
568 mass excretion” x “fecal energy content”). Uncertainty is treated as coming from Gaussian and  
569 linear sources and propagates them using the first-order Taylor series method for propagation of  
570 uncertainty.

571 Hierarchical clustering and heatmap visualization were produced using the R package “pheatmap”  
572 using Pearson correlation as distance measure for clustering and Ward's minimum variance  
573 method using an algorithm that includes Ward's criterion (Murtagh and Legendre, 2014). For the  
574 Principal Component Analysis, we used the *prcomp* function which is present in built-in R stats  
575 and the R package “factoextra” for visualization.

576 All group comparisons were analyzed by ANOVA and Tukey's honest significance test. For  
577 comparisons of metabolites identified by targeted peak extraction among groups, area values  
578 were log2 transformed before the statistical test.

## 579 **Resource availability**

### 580 *Lead contact*

581 Any further communication, including those related to resource sharing, may be directed to and  
582 fulfilled by the lead contact Emma Slack ([emma.slack@hest.ethz.ch](mailto:emma.slack@hest.ethz.ch)).

583 *Materials availability*

584 This study did not generate new unique reagents.

585 *Data and code availability*

586 Source data for Fig. 1, 2 and 3, and Suppl. Fig. 1 and 2 are available in the Supplementary  
587 Information. Source data for Fig. 4 and Suppl. Fig. 3 and the datasets and code used for all figures  
588 in this publication are made available in a curated data archive at ETH  
589 Zurich (<https://www.research-collection.ethz.ch/handle/20.500.11850/501168>) under the DOI  
590 <https://doi.org/10.3929/ethz-b-000501168>.

## 591 **ACKNOWLEDGEMENTS**

592 We would like to thanks to Sven Nowok, Thomas Fehr, Andre Galhano and Susanne Friedrich  
593 for their support in the establishment of the gnotobiotic metabolic phenotype facility in the ETH  
594 Phenomic Center. Also, we thank Maria L. Balmer for her comments and suggestions for the  
595 manuscript. The gnotobiotic metabolic phenotype facility was initially funded by the FreeNovation  
596 grant (Novartis). E.S. and W-D.H. are supported by the NCCR Microbiomes, a research  
597 consortium financed by the SNF. E.S. acknowledges the support of the Swiss National Science  
598 Foundation (40B2-0\_180953, 310030\_185128), European Research Council Consolidator Grant,  
599 and Gebert Rűf Microbials (GR073\_17) and the Botnar Research Centre for Child Health Multi-  
600 Invesitigator Project 2020. This project is part of "Zurich Exhalomics", a flagship project of  
601 "Hochschulmedizin Zürich".

## 602 **Author Contributions**

603 Conceptualization, D.H., W-D.H., C.W. and E.S.; Methodology, D.H., J.L., W.S., R.Z. C.W. and  
604 E.S.; Formal Analysis, D.H., J.L, W.S., T.G. and M.A.; Investigation, D.H., J.L., W.S. and S.N.;  
605 Resources, B.S., R.Z., W-D.H., C.W. and E.S.; Writing – Original draft, D.H. and E.S.; Writing –  
606 Review and Editing D.H., J.L., W.S, T.G, M.A, S.N., A.J.M., B.S., R.Z., W-D.H., C.W and E.S.;  
607 Visualization, D.H., W-D.H., C.W. and E.S.; Supervision, W-D.H., C.W. and E.S.; Funding  
608 acquisition, W-D.H., C.W., A.J.M, and E.S.

## 609 **Declaration of Interest**

610 The authors declare no competing interests.

611 **FIGURES TITLES AND LEGENDS**

612 **Figure 1: OligoMM12 mice have increase fat mass compared to GF mice and SPF C57B6/J**

613 **mice.** (A) Schematic representation of isolator-based indirect calorimetry system, with a TSE  
614 PhenoMaster® calorimeter connected to two flexible surgical isolators with four metabolic cages  
615 each. (B) Pictures of isolator-based indirect calorimetry system inside the facility. (C) Cecal mass  
616 (tissue including luminal content). (D) Total body mass at the end of the experiment and before  
617 cecum removal. (E) Total body mass after cecum removal. (F) Lean body mass acquired by  
618 EchoMRI before cecum removal (N of mice per group with EchoMRI and indirect calorimetry  
619 measurements: GF = 12, OligoMM12 = 8, SPF = 11). (G) Fat mass from interscapular brown  
620 adipose tissue (iBAT), inguinal white adipose tissue (iWAT) and visceral white adipose tissue  
621 (vWAT). Number of mice per group in all figures unless otherwise specified: GF = 16, OligoMM12  
622 = 12, SPF = 11. p-values obtained by Tukey's honest significance test.

623 **Figure 2: Energy metabolism in GF, OligoMM12 and SPF C57B6/J mice.** (A) Linear regression

624 of energy expenditure and lean body mass based on EchoMRI during light and dark phase. Each  
625 colored vertical line represents energy expenditure measurements during the experiment for one  
626 mouse. (B) Energy expenditure during 24h period, or during the 12h light or dark phase. Values  
627 represent area-under-curve normalized by regression-based analysis using lean body mass  
628 obtained by EchoMRI and dissected fat mass. (C, D, E) Energy expenditure values obtained by  
629 “classical” ratio-based normalization methods (dividing energy expenditure values per phase by  
630 mass). (C) Area-under-curve after normalization by total mass after cecal dissection. (D) Area-  
631 under-curve after normalization by lean body mass (EchoMRI). (E) Area-under-curve after  
632 normalization by total body mass before cecal dissection. (F) Average daily food intake per mouse.  
633 Mice represented in this figure include those that underwent long-term indirect calorimetry (Fig. 3)  
634 and mice that only contribute to daily fecal pellet quantification/bomb calorimetry. (N of mice per  
635 group: GF = 24, OligoMM12 = 19, SPF = 10) (G) Dry fecal output per mouse collected during a

636 24h period. (N of mice per group: GF = 12, OligoMM12 = 8, SPF = 4) (H) Energy content of dry  
637 fecal output by bomb calorimetry. (N of mice per group: GF = 21, OligoMM12 = 11, SPF = 11). (I,  
638 J, K, L) Estimation energy metabolism parameters. Number represented estimate mean value  $\pm$   
639  $1.96 \times$  combined standard uncertainty from measurements used for calculations. (I) Estimated daily  
640 energy input (food intake  $\times$  3.94 Kcal/g). (J) Estimated daily energy excretion (daily fecal dry  
641 mass  $\times$  fecal energy content). (K) Estimated daily energy extraction (daily energy input – daily  
642 energy excretion). (L) Estimated energy extraction from food as percentage of energy input ((daily  
643 energy input - daily energy excretion)/daily energy input  $\times$  100). Note that calculations in L, N and  
644 M are per mouse and are not normalized to body mass. Number of mice per group in all figures  
645 unless otherwise specified: GF = 9, OligoMM12 = 8, SPF = 10. p-values obtained by Tukey's  
646 honest significance test.

647 **Figure 3: Circadian changes in Respiratory Exchange Ratio (RER), microbiota-derived**  
648 **hydrogen and short-chain fatty acids (SCFAs).** (A) Comparison of circadian changes in RER  
649 among GF, OligoMM12 and SPF C57B6/J mice. RER curves obtained by smoothing function of  
650 data obtained every 24min per mouse over 10 days. Mean RER during the light phase (Zeitgeber  
651 0-12) and dark phase (Zeitgeber 12-24). (B) Cumulative food intake during described ZT periods.  
652 Mice included in this analysis are those that underwent long-term indirect calorimetry, and they  
653 are a subset of the mice represented in Fig. 2F (C) Hepatic glycogen and triglyceride concentration  
654 in samples obtained at Zeitgeber 5 and 16 (N=3 per group). (D) Hydrogen production, curves  
655 obtained by smoothing function of data obtained every 24min per mouse. Area-under-curve after  
656 regression-based normalization by cecal mass during the light and dark phase (N of mice per  
657 group: OligoMM12 = 11, SPF = 10). (E) Concentration of short-chain fatty acids (acetate, butyrate,  
658 propionate) and intermediate metabolites (lactate, succinate) products in cecal content. Number  
659 of mice per group ZT5: GF = 4, OligoMM12 = 7, SPF = 7; ZT16: GF = 5, OligoMM12 = 7, SPF =  
660 7. (F) Estimation total amount of short-chain fatty acids and intermediate metabolites by

661 multiplying measured concentration values by the cecal mass of the group. Number represented  
662 estimate mean value  $\pm$  combined standard uncertainty from measurements used for calculations.  
663 Number of mice per group in all figures unless otherwise specified: GF = 13, OligoMM12 = 12,  
664 SPF = 10. p-values obtained by Tukey's honest significance test.

665 **Figure 4. Metabolic profile comparison of GF, OligoMM12 and SPF C57B6/J mice by**  
666 **UPLC/MS.** (A and B) Principal component analysis of metabolites identified by untargeted  
667 UPLC/MS during the light phase (Zeitgeber 5) and dark phase (Zeitgeber 16) in (A) liver and (B)  
668 plasma. (C and D) Metabolic pathways identified in the KEGG PATHWAY database; red dots  
669 represent pathways containing compounds differentially enriched in (*top*) OligoMM12 vs. GF and  
670 (*bottom*) OligoMM12 vs. SPF comparisons. Samples obtained during the light phase (Zeitgeber  
671 5) and dark phase (Zeitgeber 16) in (C) liver and (D) plasma. Number of mice per group: Liver  
672 ZT5: GF = 4, OligoMM12 = 6, SPF = 7; ZT16: GF = 4, OligoMM12 = 6, SPF = 7 / Plasma: ZT5:  
673 GF = 4, OligoMM12 = 7, SPF = 7; ZT16: GF = 5, OligoMM12 = 6, SPF = 6.

674 **SUPPLEMENTAL INFORMATION TITLES AND LEGENDS**

675 **Supplementary Figure 1: Cecal mass interferes with fat mass estimation by EchoMRI. (A)**

676 Cecal mass (tissue including luminal content) as percentage of total body mass (N of mice per  
677 group: GF = 16, OligoMM12 = 12, SPF = 11) (B) Lean body mass estimated by EchoMRI with and  
678 without cecum. Equations show simple linear regression for estimating lean mass without cecum  
679 based on lean mass with cecum; in brackets adjusted-R squared. (C) Lean mass variation after  
680 cecum removal. (D) Lean mass variation after cecum removal as percentage of lean mass before  
681 cecum removal. (E) Fat body mass estimated by EchoMRI with and without cecum. Equations  
682 show simple linear regression for estimating fat mass without cecum based on fat mass with  
683 cecum; in brackets adjusted-R squared. (F) Fat mass variation after cecum removal. (G) Fat mass  
684 variation after cecum removal as percentage of lean mass before cecum removal. Number of mice  
685 per group in all figures unless otherwise specified: GF = 13, OligoMM12 = 11, SPF = 15. p-values  
686 obtained by Tukey's honest significance test.

687 **Supplementary Figure 2: Cecal mass interferes with normalization of VO<sub>2</sub>. (A) Linear**

688 regression of VO<sub>2</sub> and lean body mass (EchoMRI) during light and dark phase. Each colored  
689 vertical line represents energy expenditure measurements during the experiment per mouse. (B)  
690 VO<sub>2</sub> during 24h period, or during the 12h light or dark phase. Values represent area-under-curve  
691 normalized by regression-based analysis using lean body mass obtained by EchoMRI and  
692 dissected fat mass (C, D, E) VO<sub>2</sub> values obtained by "classical" ratio-based normalization methods  
693 (dividing energy expenditure values per phase by mass). (C) Area-under-curve after normalization  
694 by total mass after cecal dissection. (D) Area-under-curve after normalization by lean body mass.  
695 (E) Area-under-curve after normalization by total body mass before cecal dissection. Number of  
696 mice per group in all figures unless otherwise specified: GF = 9, OligoMM12 = 8, SPF = 10. p-  
697 values obtained by Tukey's honest significance test.

698 **Supplementary Figure 3. Metabolic profile comparison of GF and OligoMM12 C57B6/J mice**  
699 **by UPLC/MS.** (A and B) Principal component analysis of metabolites identified by untargeted  
700 UPLC/MS during the light phase (Zeitgeber 5) and dark phase (Zeitgeber 16) in (A) liver and (B)  
701 plasma.

702 **Supplementary Figure 4. Metabolic profile comparison of GF, OligoMM12 and SPF C57B6/J**  
703 **mice by UPLC/MS.** (A and B) Manually-curated list of compounds obtained by targeted peak  
704 extraction from differentially expressed pathways in (A) liver and (B) plasma samples. p-values  
705 obtained by Tukey's honest significance test after log<sub>2</sub> transformation of area value. Number of  
706 mice per group: Liver ZT5: GF = 4, OligoMM12 = 6, SPF = 7; ZT16: GF = 4, OligoMM12 = 6, SPF  
707 = 7 / Plasma: ZT5: GF = 4, OligoMM12 = 7, SPF = 7; ZT16: GF = 5, OligoMM12 = 6, SPF = 6.

708 **Supplementary Table 1. List of metabolites identified by targeted peak extraction in the**  
709 **UPLC/MS data.** Table indicates compound name, KEGG Entry number, type of column was  
710 used for UPLC and if the peak matched the retention time and MS<sub>2</sub> spectra identified with the  
711 chemical standard in liver and plasma samples.



## REFERENCES

- Adams, K.J., Pratt, B., Bose, N., Dubois, L.G., St John-Williams, L., Perrott, K.M., Ky, K., Kapahi, P., Sharma, V., MacCoss, M.J., et al. (2020). Skyline for Small Molecules: A Unifying Software Package for Quantitative Metabolomics. *J. Proteome Res.* *19*, 1447–1458, 10.1021/acs.jproteome.9b00640.
- Arch, J.R.S., Hislop, D., Wang, S.J.Y., and Speakman, J.R. (2006). Some mathematical and technical issues in the measurement and interpretation of open-circuit indirect calorimetry in small animals. *Int. J. Obes. (Lond)*. *30*, 1322–1331, 10.1038/sj.ijo.0803280.
- Bäckhed, F., Ding, H., Wang, T., Hooper, L. V, Koh, G.Y., Nagy, A., Semenkovich, C.F., and Gordon, J.I. (2004). The gut microbiota as an environmental factor that regulates fat storage. *Proc. Natl. Acad. Sci. U. S. A.* *101*, 15718–15723, 10.1073/pnas.0407076101.
- Bäckhed, F., Manchester, J.K., Semenkovich, C.F., and Gordon, J.I. (2007). Mechanisms underlying the resistance to diet-induced obesity in germ-free mice. *Proc. Natl. Acad. Sci. U. S. A.* *104*, 979–984, 10.1073/pnas.0605374104.
- Barlow, J.T., Bogatyrev, S.R., and Ismagilov, R.F. (2020). A quantitative sequencing framework for absolute abundance measurements of mucosal and luminal microbial communities. *Nat. Commun.* *11*, 1–13, 10.1038/s41467-020-16224-6.
- Becker, N., Kunath, J., Loh, G., and Blaut, M. (2011). Human intestinal microbiota: Characterization of a simplified and stable gnotobiotic rat model. *Gut Microbes* *2*, 25–33, 10.4161/gmic.2.1.14651.
- Belenguer, A., Holtrop, G., Duncan, S.H., Anderson, S.E., Calder, A.G., Flint, H.J., and Lobley, G.E. (2011). Rates of production and utilization of lactate by microbial communities from the human colon. *FEMS Microbiol. Ecol.* *77*, 107–119, 10.1111/j.1574-6941.2011.01086.x.
- Brugiroux, S., Beutler, M., Pfann, C., Garzetti, D., Ruscheweyh, H.J., Ring, D., Diehl, M., Herp, S., Lotscher, Y., Hussain, S., et al. (2016). Genome-guided design of a defined mouse microbiota that confers colonization resistance against *Salmonella enterica* serovar Typhimurium. *Nat Microbiol* *2*, 16215, 10.1038/nmicrobiol.2016.215.
- Butler, A.A., and Kozak, L.P. (2010). A recurring problem with the analysis of energy expenditure in genetic models expressing lean and obese phenotypes. *Diabetes* *59*, 323–329, 10.2337/db09-1471.
- Caesar, R., Tremaroli, V., Kovatcheva-Datchary, P., Cani, P.D., and Bäckhed, F. (2015). Crosstalk between Gut Microbiota and Dietary Lipids Aggravates WAT Inflammation through TLR Signaling. *Cell Metab.* *22*, 658–668, 10.1016/J.CMET.2015.07.026.
- Cai, T.Q., Ren, N., Jin, L., Cheng, K., Kash, S., Chen, R., Wright, S.D., Taggart, A.K.P., and Waters, M.G. (2008). Role of GPR81 in lactate-mediated reduction of adipose lipolysis.

Biochem. Biophys. Res. Commun. 377, 987–991, 10.1016/j.bbrc.2008.10.088.

Cani, P.D., Van Hul, M., Lefort, C., Depommier, C., Rastelli, M., and Everard, A. (2019). Microbial regulation of organismal energy homeostasis. *Nat. Metab.* 1, 34–46, 10.1038/s42255-018-0017-4.

Chong, J., and Xia, J. (2018). MetaboAnalystR: an R package for flexible and reproducible analysis of metabolomics data. *Bioinformatics* 34, 4313–4314, 10.1093/bioinformatics/bty528.

Claus, S.P., Tsang, T.M., Wang, Y., Cloarec, O., Skordi, E., Martin, F.-P., Rezzi, S., Ross, A., Kochhar, S., Holmes, E., et al. (2008). Systemic multicompartmental effects of the gut microbiome on mouse metabolic phenotypes. *Mol. Syst. Biol.* 4, 219, 10.1038/msb.2008.56.

Corrigan, J.K., Ramachandran, D., He, Y., Palmer, C.J., Jurczak, M.J., Chen, R., Li, B., Friedline, R.H., Kim, J.K., Ramsey, J.J., et al. (2020). A big-data approach to understanding metabolic rate and response to obesity in laboratory mice. *Elife* 9, 10.7554/elife.53560.

Dennis, P.P., and Bremer, H. (2008). Modulation of Chemical Composition and Other Parameters of the Cell at Different Exponential Growth Rates. *EcoSal Plus* 3, 10.1128/ecosal.5.2.3.

Doi, R., Oishi, K., and Ishida, N. (2010). CLOCK regulates circadian rhythms of hepatic glycogen synthesis through transcriptional activation of Gys2. *J. Biol. Chem.* 285, 22114–22121, 10.1074/jbc.M110.110361.

Duncan, S.H., Louis, P., and Flint, H.J. (2004). Lactate-utilizing bacteria, isolated from human feces, that produce butyrate as a major fermentation product. *Appl. Environ. Microbiol.* 70, 5810–5817, 10.1128/AEM.70.10.5810-5817.2004.

Eberl, C., Ring, D., Münch, P.C., Beutler, M., Basic, M., Slack, E.C., Schwarzer, M., Srutkova, D., Lange, A., Frick, J.S., et al. (2020). Reproducible Colonization of Germ-Free Mice With the Oligo-Mouse-Microbiota in Different Animal Facilities. *Front. Microbiol.* 10, 2999, 10.3389/fmicb.2019.02999.

Faith, J.J., Ahern, P.P., Ridaura, V.K., Cheng, J., and Gordon, J.I. (2014). Identifying gut microbe-host phenotype relationships using combinatorial communities in gnotobiotic mice. *Sci. Transl. Med.* 6, 220ra11-220ra11, 10.1126/scitranslmed.3008051.

Fernández-Verdejo, R., Ravussin, E., Speakman, J.R., and Galgani, J.E. (2019). Progress and challenges in analyzing rodent energy expenditure. *Nat. Methods* 16, 797–799, 10.1038/s41592-019-0513-9.

Fetissov, S.O. (2017). Role of the gut microbiota in host appetite control: Bacterial growth to animal feeding behaviour. *Nat. Rev. Endocrinol.* 13, 11–25, 10.1038/nrendo.2016.150.

Fleissner, C.K., Huebel, N., El-Bary, M.M.A., Loh, G., Klaus, S., and Blaut, M. (2010). Absence

of intestinal microbiota does not protect mice from diet-induced obesity. *Br. J. Nutr.* *104*, 919–929, [10.1017/S0007114510001303](https://doi.org/10.1017/S0007114510001303).

Flint, H.J., Duncan, S.H., Scott, K.P., and Louis, P. (2015). Links between diet, gut microbiota composition and gut metabolism. *Proc. Nutr. Soc.* *74*, 13–22, [10.1017/S0029665114001463](https://doi.org/10.1017/S0029665114001463).

Gordon, H.A., and Pesti, L. (1971). The gnotobiotic animal as a tool in the study of host microbial relationships. *Bact. Rev.* *35*, 390–429, [10.1126/science.173.3992.171](https://doi.org/10.1126/science.173.3992.171).

Goswami, C., Iwasaki, Y., and Yada, T. (2018). Short-chain fatty acids suppress food intake by activating vagal afferent neurons. *J. Nutr. Biochem.* *57*, 130–135, [10.1016/j.jnutbio.2018.03.009](https://doi.org/10.1016/j.jnutbio.2018.03.009).

Halatchev, I.G., O'Donnell, D., Hibberd, M.C., and Gordon, J.I. (2019). Applying indirect open-circuit calorimetry to study energy expenditure in gnotobiotic mice harboring different human gut microbial communities. *Microbiome* *7*, 158, [10.1186/s40168-019-0769-4](https://doi.org/10.1186/s40168-019-0769-4).

Harley, I.T.W., and Karp, C.L. (2012). Obesity and the gut microbiome: Striving for causality. *Mol. Metab.* *1*, 21–31, [10.1016/j.molmet.2012.07.002](https://doi.org/10.1016/j.molmet.2012.07.002).

Ishikawa, K., and Shimazu, T. (1976). Daily rhythms of glycogen synthetase and phosphorylase activities in rat liver: influence of food and light. *Life Sci.* *19*, 1873–1878, [10.1016/0024-3205\(76\)90119-3](https://doi.org/10.1016/0024-3205(76)90119-3).

Kaiyala, K.J., and Schwartz, M.W. (2011). Toward a more complete (and less controversial) understanding of energy expenditure and its role in obesity pathogenesis. *Diabetes* *60*, 17–23, [10.2337/db10-0909](https://doi.org/10.2337/db10-0909).

Koh, A., and Bäckhed, F. (2020). From Association to Causality: the Role of the Gut Microbiota and Its Functional Products on Host Metabolism. *Mol. Cell* *78*, 584–596, [10.1016/j.molcel.2020.03.005](https://doi.org/10.1016/j.molcel.2020.03.005).

Kovatcheva-Datchary, P., Shoaie, S., Lee, S., Wahlström, A., Nookaew, I., Hallen, A., Perkins, R., Nielsen, J., and Bäckhed, F. (2019). Simplified Intestinal Microbiota to Study Microbe-Diet-Host Interactions in a Mouse Model. *Cell Rep.* *26*, 3772–3783.e6, [10.1016/j.celrep.2019.02.090](https://doi.org/10.1016/j.celrep.2019.02.090).

Krisko, T.I., Nicholls, H.T., Bare, C.J., Holman, C.D., Putzel, G.G., Jansen, R.S., Sun, N., Rhee, K.Y., Banks, A.S., and Cohen, D.E. (2020). Dissociation of Adaptive Thermogenesis from Glucose Homeostasis in Microbiome-Deficient Mice. *Cell Metab.* *31*, 592–604.e9, [10.1016/J.CMET.2020.01.012](https://doi.org/10.1016/J.CMET.2020.01.012).

Kuang, Z., Wang, Y., Li, Y., Ye, C., Ruhn, K.A., Behrendt, C.L., Olson, E.N., and Hooper, L. V. (2019). The intestinal microbiota programs diurnal rhythms in host metabolism through histone deacetylase 3. *Science* *365*, 1428–1434, [10.1126/science.aaw3134](https://doi.org/10.1126/science.aaw3134).

Kübeck, R., Bonet-Ripoll, C., Hoffmann, C., Walker, A., Müller, V.M., Schüppel, V.L., Lagkouvardos, I., Scholz, B., Engel, K.-H., Daniel, H., et al. (2016). Dietary fat and gut

microbiota interactions determine diet-induced obesity in mice. *Mol. Metab.* 5, 1162–1174, 10.1016/j.molmet.2016.10.001.

Levenson, S.M. (1978). The influence of the indigenous microflora on mammalian metabolism and nutrition. *JPEN. J. Parenter. Enteral Nutr.* 2, 78–107, 10.1177/014860717800200203.

Levenson, S.M., Doft, F., Lev, M., and Kan, D. (1969). Influence of microorganisms on oxygen consumption, carbon dioxide production and colonic temperature of rats. *J. Nutr.* 97, 542–552, 10.1093/jn/97.4.542.

Li, B., Li, L., Li, M., Lam, S.M., Wang, G., Wu, Y., Zhang, H., Niu, C., Zhang, X., Liu, X., et al. (2019). Microbiota Depletion Impairs Thermogenesis of Brown Adipose Tissue and Browning of White Adipose Tissue. *Cell Rep.* 26, 2720–2737.e5, 10.1016/j.celrep.2019.02.015.

Li, M., Li, L., Li, B., Hambly, C., Wang, G., Wu, Y., Jin, Z., Wang, A., Niu, C., Wolfrum, C., et al. (2021). Brown adipose tissue is the key depot for glucose clearance in microbiota depleted mice. *Nat. Commun.* 12, 1–13, 10.1038/s41467-021-24659-8.

Liebisch, G., Ecker, J., Roth, S., Schweizer, S., Öttl, V., Schött, H.F., Yoon, H., Haller, D., Holler, E., Burkhardt, R., et al. (2019). Quantification of fecal short chain fatty acids by liquid chromatography tandem mass spectrometry—investigation of pre-analytic stability. *Biomolecules* 9, 121, 10.3390/biom9040121.

Lin, H. V., Frassetto, A., Kowalik Jr, E.J., Nawrocki, A.R., Lu, M.M., Kosinski, J.R., Hubert, J.A., Szeto, D., Yao, X., Forrest, G., et al. (2012). Butyrate and Propionate Protect against Diet-Induced Obesity and Regulate Gut Hormones via Free Fatty Acid Receptor 3-Independent Mechanisms. *PLoS One* 7, e35240, 10.1371/journal.pone.0035240.

Liu, C., Wu, J., Zhu, J., Kuei, C., Yu, J., Shelton, J., Sutton, S.W., Li, X., Su, J.Y., Mirzadegan, T., et al. (2009). Lactate inhibits lipolysis in fat cells through activation of an orphan G-protein-coupled receptor, GPR81. *J. Biol. Chem.* 284, 2811–2822, 10.1074/jbc.M806409200.

MacLean, P.S., Blundell, J.E., Mennella, J.A., and Batterham, R.L. (2017). Biological control of appetite: A daunting complexity. *Obesity* 25, S8–S16, 10.1002/oby.21771.

Mallapaty, S. (2017). Gnotobiotics: getting a grip on the microbiome boom. *Lab Anim. (NY)*. 46, 373–377, 10.1038/labani.1344.

Mardinoglu, A., Shoaie, S., Bergentall, M., Ghaffari, P., Zhang, C., Larsson, E., Bäckhed, F., and Nielsen, J. (2015). The gut microbiota modulates host amino acid and glutathione metabolism in mice. *Mol. Syst. Biol.* 11, 834, 10.15252/MSB.20156487.

Meyer, C.W., Reitmeir, P., and Tschop, M.H. (2015). Exploration of Energy Metabolism in the Mouse Using Indirect Calorimetry: Measurement of Daily Energy Expenditure (DEE) and Basal Metabolic Rate (BMR). *Curr Protoc Mouse Biol* 5, 205–222, 10.1002/9780470942390.mo140216.

Mina, A.I., LeClair, R.A., LeClair, K.B., Cohen, D.E., Lantier, L., and Banks, A.S. (2018). CalR: A Web-Based Analysis Tool for Indirect Calorimetry Experiments. *Cell Metab.* 28, 656–666, 10.1016/j.cmet.2018.06.019.

Moor, K., Fadlallah, J., Toska, A., Sterlin, D., Balmer, M.L., Macpherson, A.J., Gorochov, G., Larsen, M., and Slack, E. (2016). Analysis of bacterial-surface-specific antibodies in body fluids using bacterial flow cytometry. *Nat Protoc* 11, 1531–1553, 10.1038/nprot.2016.091.

Murtagh, F., and Legendre, P. (2014). Ward's Hierarchical Agglomerative Clustering Method: Which Algorithms Implement Ward's Criterion? *J. Classif.* 2014 313 31, 274–295, 10.1007/S00357-014-9161-Z.

Nowak, N. (2021). Metabolic Insights Related to Sleep and Circadian Clocks from Mass Spectrometry-Based Analysis of Blood and Breath. 10.3929/ETHZ-B-000480810.

Packard, G.C., and Boardman, T.J. (1999). The use of percentages and size-specific indices to normalize physiological data for variation in body size: Wasted time, wasted effort? *Comp. Biochem. Physiol. - A Mol. Integr. Physiol.* 122, 37–44, 10.1016/S1095-6433(98)10170-8.

Popovic, M. (2019). Thermodynamic properties of microorganisms: determination and analysis of enthalpy, entropy, and Gibbs free energy of biomass, cells and colonies of 32 microorganism species. *Heliyon* 5, e01950, 10.1016/j.heliyon.2019.e01950.

Rabasa, C., and Dickson, S.L. (2016). Impact of stress on metabolism and energy balance. *Curr. Opin. Behav. Sci.* 9, 71–77, 10.1016/J.COBEHA.2016.01.011.

Ridaura, V.K., Faith, J.J., Rey, F.E., Cheng, J., Duncan, A.E., Kau, A.L., Griffin, N.W., Lombard, V., Henrissat, B., Bain, J.R., et al. (2013). Gut microbiota from twins discordant for obesity modulate metabolism in mice. *Science* 341, 1241214, 10.1126/science.1241214.

Sayin, S.I., Wahlström, A., Felin, J., Jäntti, S., Marschall, H.U., Bamberg, K., Angelin, B., Hyötyläinen, T., Orešič, M., and Bäckhed, F. (2013). Gut microbiota regulates bile acid metabolism by reducing the levels of tauro-beta-muricholic acid, a naturally occurring FXR antagonist. *Cell Metab.* 17, 225–235, 10.1016/j.cmet.2013.01.003.

Schmidt, T.S.B., Raes, J., and Bork, P. (2018). The Human Gut Microbiome: From Association to Modulation. *Cell* 172, 1198–1215, 10.1016/j.cell.2018.02.044.

von Schwartzberg, R.J., Bisanz, J.E., Lyalina, S., Spanogiannopoulos, P., Ang, Q.Y., Cai, J., Dickmann, S., Friedrich, M., Liu, S.-Y., Collins, S.L., et al. (2021). Caloric restriction disrupts the microbiota and colonization resistance. *Nature* 1–6, 10.1038/s41586-021-03663-4.

Smith, C.A., Want, E.J., O'Maille, G., Abagyan, R., and Siuzdak, G. (2006). XCMS: processing mass spectrometry data for metabolite profiling using nonlinear peak alignment, matching, and identification. *Anal. Chem.* 78, 779–787, 10.1021/ac051437y.

Sonnenburg, J.L., and Bäckhed, F. (2016). Diet-microbiota interactions as moderators of human metabolism. *Nature* 535, 56–64, 10.1038/nature18846.

Speakman, J.R. (2013). Measuring energy metabolism in the mouse - theoretical, practical, and analytical considerations. *Front Physiol* 4, 34, 10.3389/fphys.2013.00034.

Steimle, A., De Sciscio, A., Neumann, M., Grant, E.T., Pereira, G. V., Ohno, H., Martens, E.C., and Desai, M.S. (2021). Constructing a gnotobiotic mouse model with a synthetic human gut microbiome to study host–microbe cross talk. *STAR Protoc.* 2, 100607, 10.1016/J.XPRO.2021.100607.

Streidl, T., Karkossa, I., Segura Muñoz, R.R., Eberl, C., Zaufel, A., Plagge, J., Schmaltz, R., Schubert, K., Basic, M., Schneider, K.M., et al. (2021). The gut bacterium *Extibacter muris* produces secondary bile acids and influences liver physiology in gnotobiotic mice. *Gut Microbes* 13, 1–21, 10.1080/19490976.2020.1854008.

Stubbs, R.J., Hopkins, M., Finlayson, G.S., Duarte, C., Gibbons, C., and Blundell, J.E. (2018). Potential effects of fat mass and fat-free mass on energy intake in different states of energy balance. *Eur. J. Clin. Nutr.* 72, 698–709, 10.1038/s41430-018-0146-6.

Suárez-Zamorano, N., Fabbiano, S., Chevalier, C., Stojanović, O., Colin, D.J., Stevanović, A., Veyrat-Durebex, C., Tarallo, V., Rigo, D., Germain, S., et al. (2015). Microbiota depletion promotes browning of white adipose tissue and reduces obesity. *Nat. Med.* 21, 1497–1501, 10.1038/nm.3994.

Tahara, Y., Yamazaki, M., Sukigara, H., Motohashi, H., Sasaki, H., Miyakawa, H., Haraguchi, A., Ikeda, Y., Fukuda, S., and Shibata, S. (2018). Gut Microbiota-Derived Short Chain Fatty Acids Induce Circadian Clock Entrainment in Mouse Peripheral Tissue. *Sci. Rep.* 8, 1395, 10.1038/s41598-018-19836-7.

Tanner, J.M. (1949). Fallacy of per-weight and per-surface area standards, and their relation to spurious correlation. *J. Appl. Physiol.* 2, 1–15, 10.1152/jappl.1949.2.1.1.

Thaiss, C.A., Zeevi, D., Levy, M., Zilberman-Schapira, G., Suez, J., Tengeler, A.C., Abramson, L., Katz, M.N., Korem, T., Zmora, N., et al. (2014). Transkingdom control of microbiota diurnal oscillations promotes metabolic homeostasis. *Cell* 159, 514–529, 10.1016/j.cell.2014.09.048.

Thaiss, C.A., Levy, M., Korem, T., Dohnalova, L., Shapiro, H., Jaitin, D.A., David, E., Winter, D.R., Gury-BenAri, M., Tatirovsky, E., et al. (2016). Microbiota Diurnal Rhythmicity Programs Host Transcriptome Oscillations. *Cell* 167, 1495-1510 e12, 10.1016/j.cell.2016.11.003.

Touw, K., Ringus, D.L., Hubert, N., Wang, Y., Leone, V.A., Nadimpalli, A., Theriault, B.R., Huang, Y.E., Tune, J.D., Herring, P.B., et al. (2017). Mutual reinforcement of pathophysiological host-microbe interactions in intestinal stasis models. *Physiol. Rep.* 5, e13182, 10.14814/PHY2.13182.



Tschop, M.H., Speakman, J.R., Arch, J.R., Auwerx, J., Bruning, J.C., Chan, L., Eckel, R.H., Farese Jr., R. V, Galgani, J.E., Hambly, C., et al. (2011). A guide to analysis of mouse energy metabolism. *Nat Methods* 9, 57–63, 10.1038/nmeth.1806.

Turnbaugh, P.J., Ley, R.E., Mahowald, M.A., Magrini, V., Mardis, E.R., and Gordon, J.I. (2006). An obesity-associated gut microbiome with increased capacity for energy harvest. *Nature* 444, 1027–1031, 10.1038/nature05414.

Ucar, I., Pebesma, E., and Azcorra, A. (2019). Measurement errors in R. *R J.* 10, 549–557, 10.32614/RJ-2018-075.

Walter, J., Armet, A.M., Finlay, B.B., and Shanahan, F. (2020). Establishing or Exaggerating Causality for the Gut Microbiome: Lessons from Human Microbiota-Associated Rodents. *Cell* 180, 221–232, 10.1016/j.cell.2019.12.025.

Wang, Y., Kuang, Z., Yu, X., Ruhn, K.A., Kubo, M., and Hooper, L. V. (2017). The intestinal microbiota regulates body composition through NFIL3 and the circadian clock. *Science* 357, 912–916, 10.1126/science.aan0677.

Weir, J.B.D.B. (1949). New methods for calculating metabolic rate with special reference to protein metabolism. *J. Physiol.* 109, 1–9, 10.1113/jphysiol.1949.sp004363.

Weiss, A.S., Burrichter, A.G., Chakravarthy, A., Raj, D., Von Stempel, A., Meng, C., Kleigrewe, K., Münch, P.C., Rössler, L., Huber, C., et al. (2021). In vitro interaction network of a synthetic gut bacterial community. *ISME J.* 2021 1–15, 10.1038/s41396-021-01153-z.

White, C.R., and Seymour, R.S. (2005). Allometric scaling of mammalian metabolism. *J. Exp. Biol.* 208, 1611–1619, 10.1242/jeb.01501.

Wostmann, B.S., Bruckner-Kardoss, E., and Knight, P.L. (1968). Cecal Enlargement, Cardiac Output, and O<sub>2</sub> Consumption in Germfree Rats. *Exp. Biol. Med.* 128, 137–141, 10.3181/00379727-128-32962.

Wostmann, B.S., Larkin, C., Moriarty, A., and Bruckner-Kardoss, E. (1983). Dietary intake, energy metabolism, and excretory losses of adult male germfree Wistar rats. *Lab. Anim. Sci.* 33, 46–50.

Woting, A., Pfeiffer, N., Loh, G., Klaus, S., and Blaut, M. (2014). *Clostridium ramosum* promotes High-Fat diet-induced obesity in Gnotobiotic Mouse Models. *MBio* 5, 1530–1544, 10.1128/mBio.01530-14.

Woting, A., Pfeiffer, N., Hanske, L., Loh, G., Klaus, S., and Blaut, M. (2015). Alleviation of high fat diet-induced obesity by oligofructose in gnotobiotic mice is independent of presence of *Bifidobacterium longum*. *Mol. Nutr. Food Res.* 59, 2267–2278, 10.1002/mnfr.201500249.

Wotzka, S.Y., Kreuzer, M., Maier, L., Arnoldini, M., Nguyen, B.D., Brachmann, A.O., Berthold,

D.L., Zünd, M., Hausmann, A., Bakkeren, E., et al. (2019). *Escherichia coli* limits *Salmonella* Typhimurium infections after diet shifts and fat-mediated microbiota perturbation in mice. *Nat. Microbiol.* 10.1038/s41564-019-0568-5.

Yao, L., Seaton, S.C., Ndousse-Fetter, S., Adhikari, A.A., DiBenedetto, N., Mina, A.I., Banks, A.S., Bry, L., and Devlin, A.S. (2018). A selective gut bacterial bile salt hydrolase alters host metabolism. *Elife* 7, 10.7554/eLife.37182.

Yilmaz, B., Mooser, C., Keller, I., Li, H., Zimmermann, J., Bosshard, L., Fuhrer, T., Gomez de Agüero, M., Trigo, N.F., Tschanz-Lischer, H., et al. (2021). Long-term evolution and short-term adaptation of microbiota strains and sub-strains in mice. *Cell Host Microbe* 29, 650-663.e9, 10.1016/j.chom.2021.02.001.

Zarrinpar, A., Chaix, A., Yooseph, S., and Panda, S. (2014). Diet and feeding pattern affect the diurnal dynamics of the gut microbiome. *Cell Metab.* 20, 1006–1017, 10.1016/j.cmet.2014.11.008.

Zarrinpar, A., Chaix, A., Xu, Z.Z., Chang, M.W., Marotz, C.A., Saghatelian, A., Knight, R., and Panda, S. (2018). Antibiotic-induced microbiome depletion alters metabolic homeostasis by affecting gut signaling and colonic metabolism. *Nat. Commun.* 2018 9 1–13, 10.1038/s41467-018-05336-9.



## SUPPLEMENTARY TABLE

**Supplementary Table 1. List of metabolites identified by targeted peak extraction in the UPLC/MS data.** Table indicates compound name, KEGG Entry number, type of column was used for UPLC and if the peak ID matched the retention time and MS2 spectra identified with the chemical standard in liver and plasma samples.

| Compound                  | KEGG Entry | Column         | Matched peak ID in Liver | Matched peak ID in Plasma |
|---------------------------|------------|----------------|--------------------------|---------------------------|
| (R)-3-hydroxybutanic acid | C01089     | RP Negative    | Yes                      | No                        |
| 5-Oxoproline              | C01879     | AMIDE Positive | Yes                      | Yes                       |
| Arachidonic acid          | C00219     | RP Negative    | Yes                      | Yes                       |
| Betaine                   | C00719     | AMIDE Positive | No                       | Yes                       |
| beta-Murocholic acid      | C17726     | RP Negative    | Yes                      | Yes                       |
| Cholic acid               | C00695     | RP Negative    | Yes                      | Yes                       |
| Citrulline                | C00327     | AMIDE Positive | Yes                      | Yes                       |
| Cortisol                  | C00735     | RP Positive    | Yes                      | No                        |
| Creatine                  | C00300     | AMIDE Positive | Yes                      | Yes                       |

|                       |        |                |     |     |
|-----------------------|--------|----------------|-----|-----|
| Creatinine            | C00791 | AMIDE Positive | No  | Yes |
| Cystathionine         | C02291 | AMIDE Positive | Yes | Yes |
| Deoxycholic acid      | C04483 | RP Negative    | No  | Yes |
| Docosapentaenoic acid | C16513 | RP Negative    | Yes | Yes |
| Glutathione (GSH)     | C00051 | AMIDE Positive | No  | Yes |
| Glycine               | C00037 | AMIDE Positive | Yes | Yes |
| Glycocholic acid      | C01921 | RP Positive    | Yes | No  |
| Hexadecanedioic acid  |        | RP Negative    | Yes | Yes |
| Hippuric acid         | C01586 | RP Negative    | Yes | Yes |
| L-(+)-Ornithine       | C00077 | AMIDE Positive | Yes | Yes |
| L-4-Hydroxyproline    | C01157 | AMIDE Positive | Yes | Yes |
| L-Alanine             | C00041 | AMIDE Positive | Yes | Yes |
| L-Arginine            | C00062 | AMIDE Positive | Yes | Yes |
| Lauroylcarnitine      |        | RP Positive    | Yes | Yes |

|                     |        |                |     |     |
|---------------------|--------|----------------|-----|-----|
| Leucine             | C00123 | RP Positive    | Yes | Yes |
| L-Glutamic acid     | C00025 | AMIDE Positive | Yes | Yes |
| L-Histidine         | C00135 | AMIDE Positive | Yes | Yes |
| Linoleic acid       | C01595 | RP Negative    | Yes | Yes |
| L-Isoleucine        | C00407 | RP Positive    | Yes | Yes |
| L-Lysine            | C00047 | AMIDE Positive | Yes | Yes |
| L-Methionine        | C00073 | AMIDE Positive | Yes | Yes |
| L-Proline           | C00148 | AMIDE Positive | Yes | Yes |
| L-Serine            | C00065 | AMIDE Positive | Yes | Yes |
| L-Threonine         | C00188 | AMIDE Positive | Yes | Yes |
| L-Tryptophan        | C00078 | RP Negative    | Yes | Yes |
| L-Tyrosine          | C00082 | RP Negative    | Yes | Yes |
| Myristic acid       | C06424 | RP Negative    | Yes | Yes |
| N,N-dimethylglycine | C01026 | AMIDE Positive | Yes | Yes |

|                              |        |                         |     |     |
|------------------------------|--------|-------------------------|-----|-----|
| N-Acetylmethionine           | C02712 | RP<br>Positive/Negative | Yes | Yes |
| Oxidized glutathione (GSSG)  | C00127 | AMIDE Negative          | Yes | Yes |
| Pantothenic acid             | C00864 | RP Positive             | Yes | Yes |
| Pipecolic acid               | C00408 | RP Positive             | Yes | Yes |
| Serotonin                    | C00780 | RP Positive             | Yes | Yes |
| Succinic acid                | C00042 | RP Negative             | Yes | Yes |
| Taurine                      | C00245 | AMIDE Negative          | Yes | Yes |
| Taurine-beta-murocholic acid |        | AMIDE Negative          | Yes | Yes |
| Taurochenodeoxycholic acid   | C05465 | AMIDE Negative          | Yes | Yes |
| Tetradecanedioic acid        |        | RP Negative             | Yes | Yes |

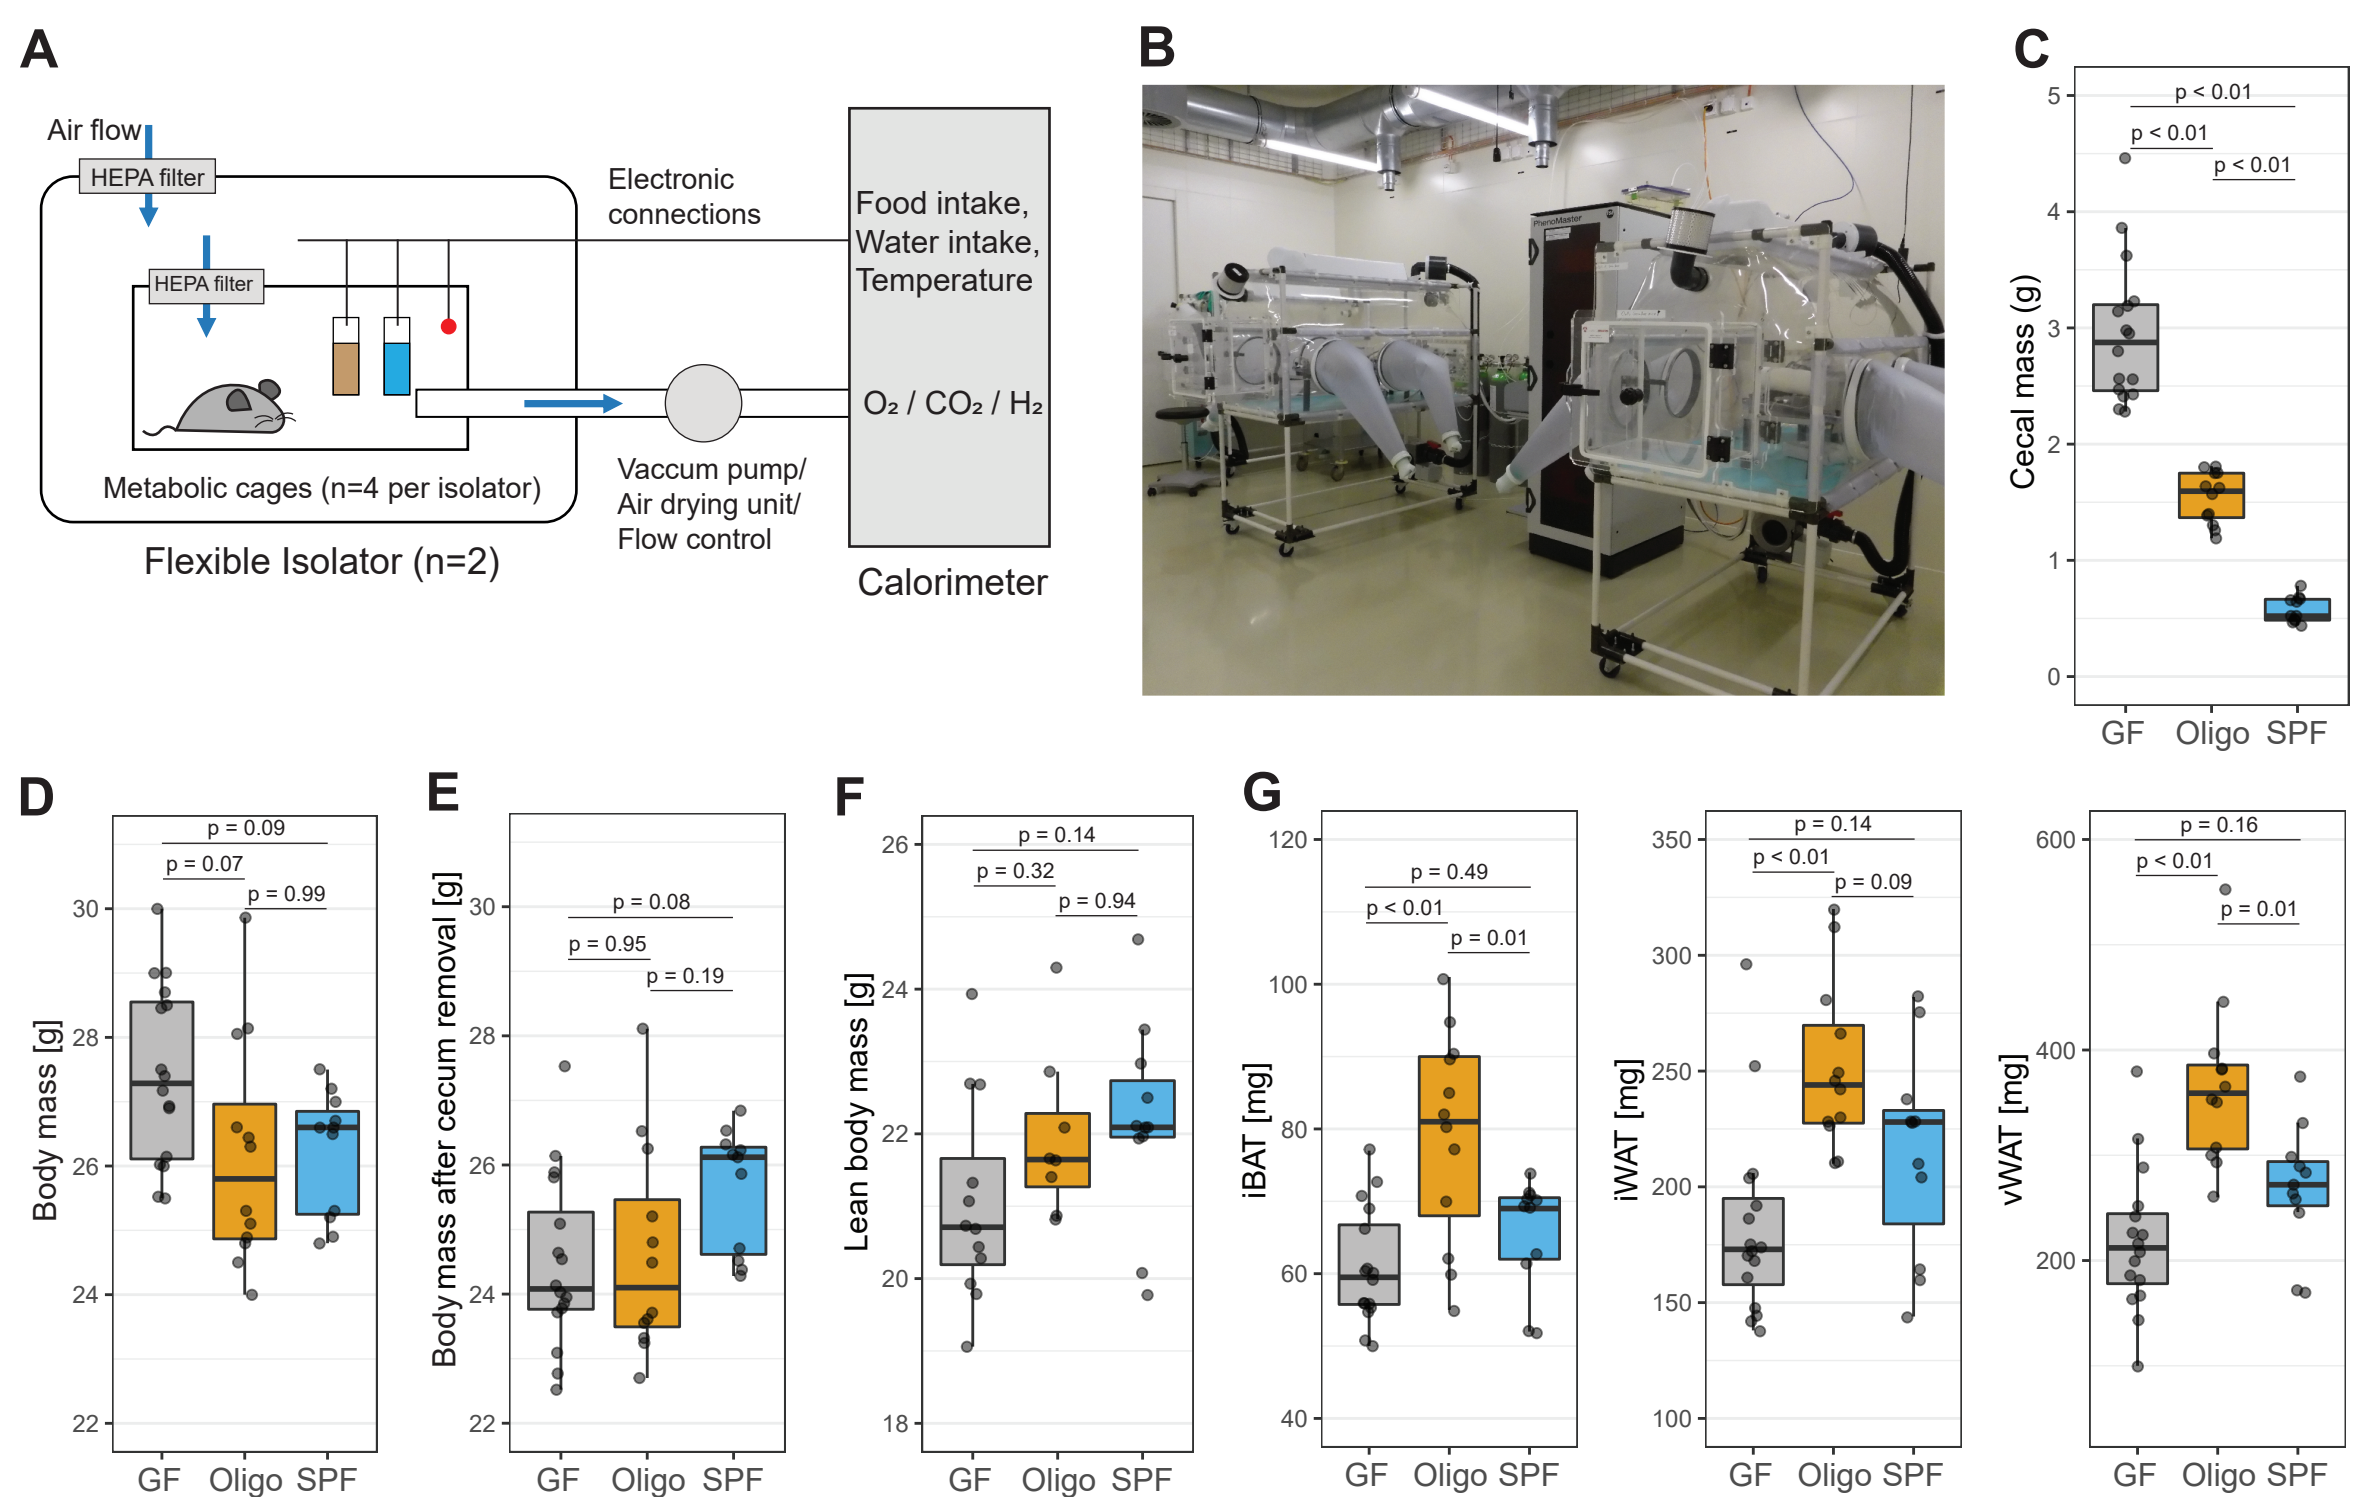

**Figure 1: OligoMM12 mice have increase fat mass compared to GF mice and SPF C57B6/J mice.**

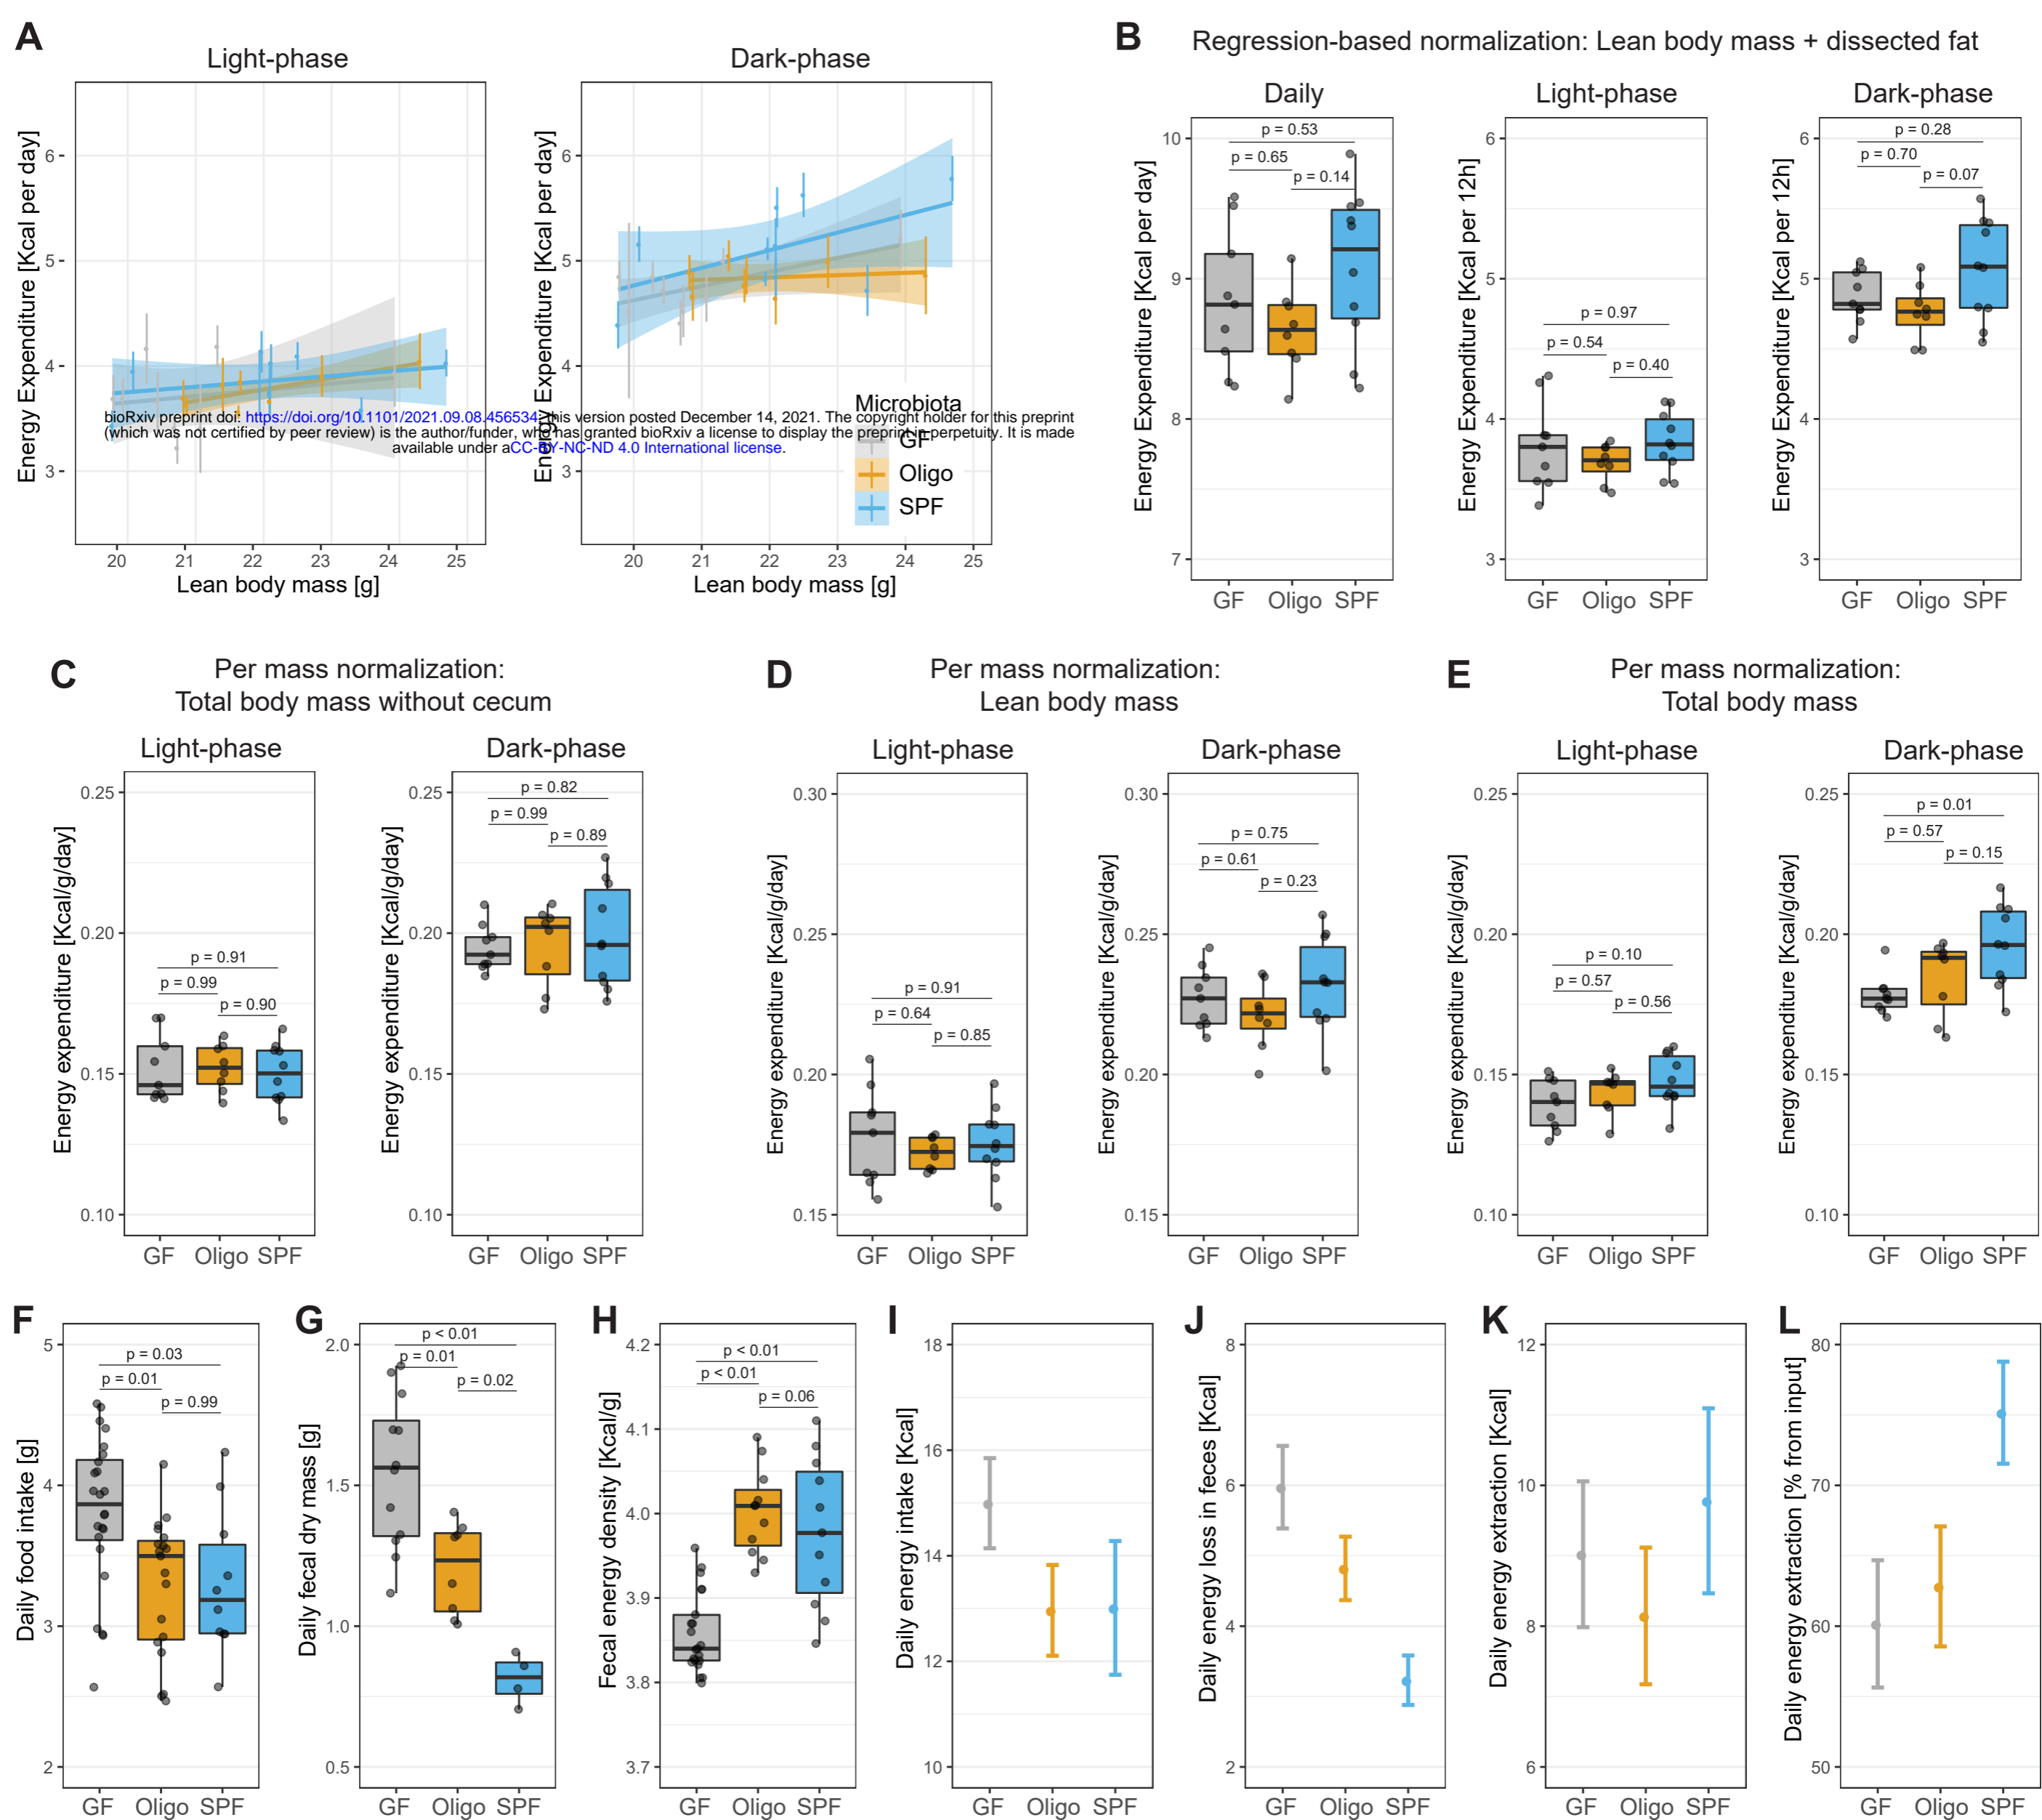

**Figure 2: Energy metabolism in GF, OligoMM12 and SPF C57B6/J mice.**

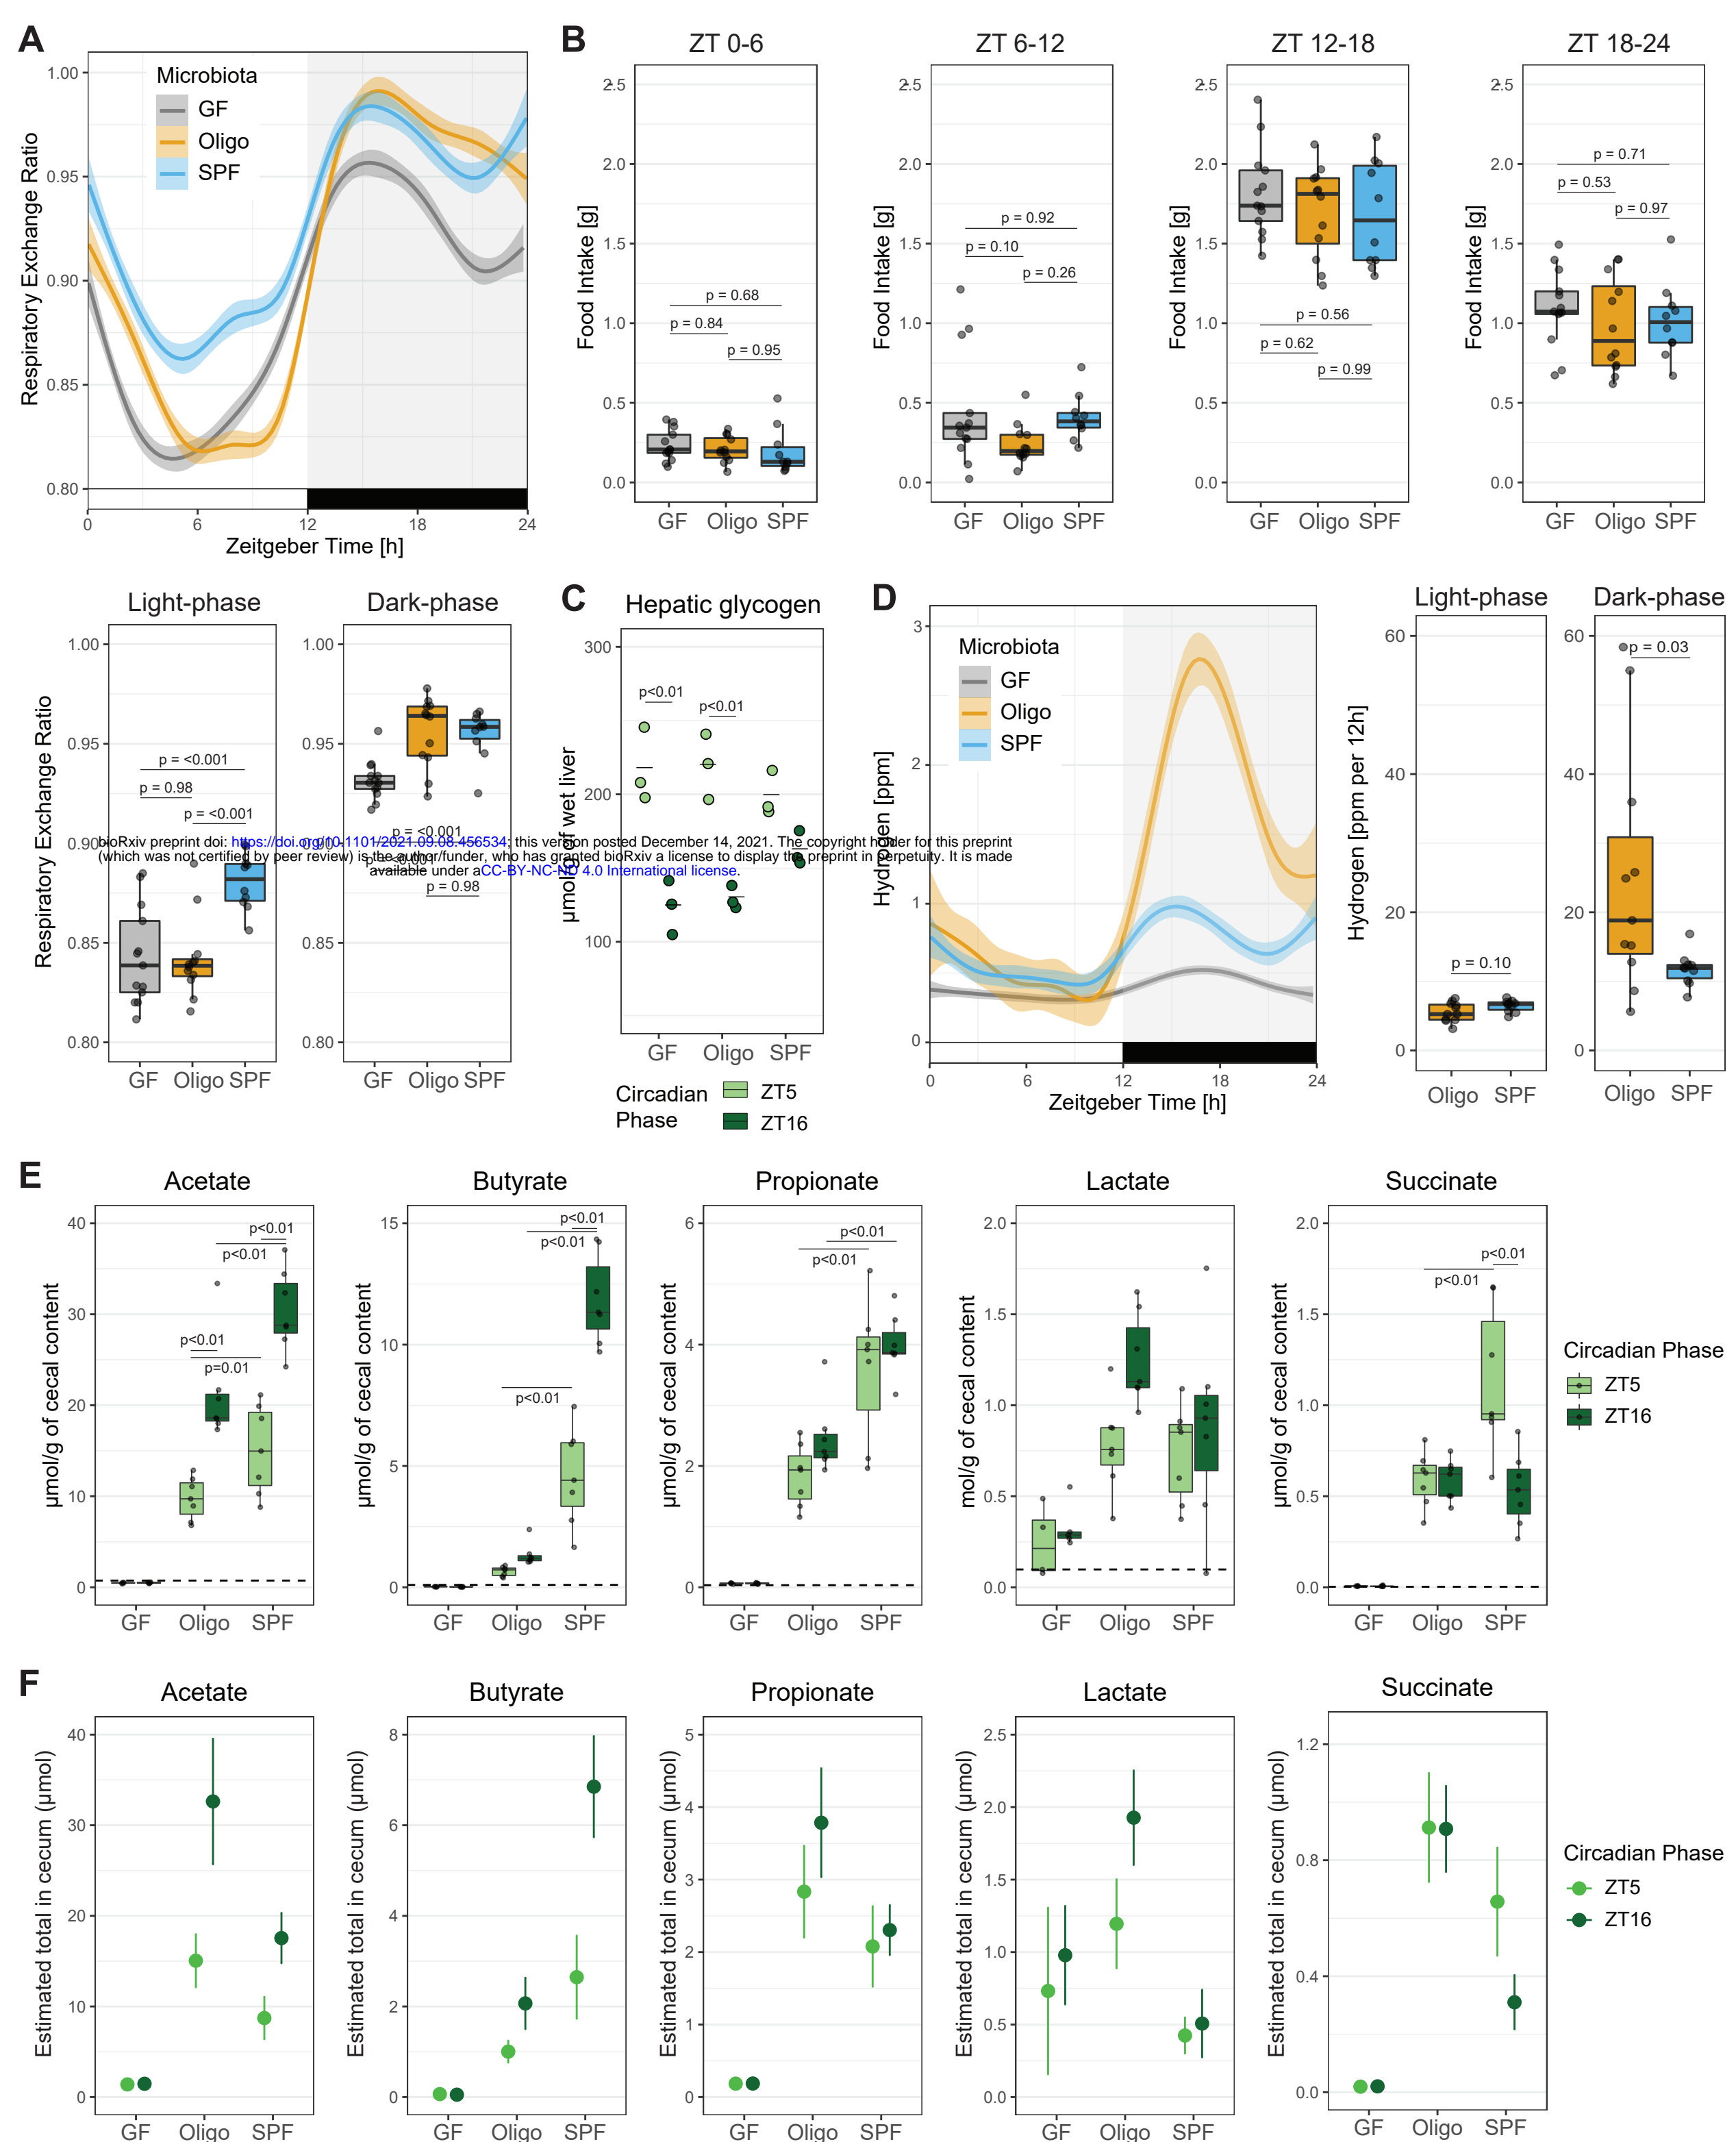

**Figure 3: Circadian changes in Respiratory Exchange Ratio (RER), microbiota-derived hydrogen and short-chain fatty acids (SCFAs).**



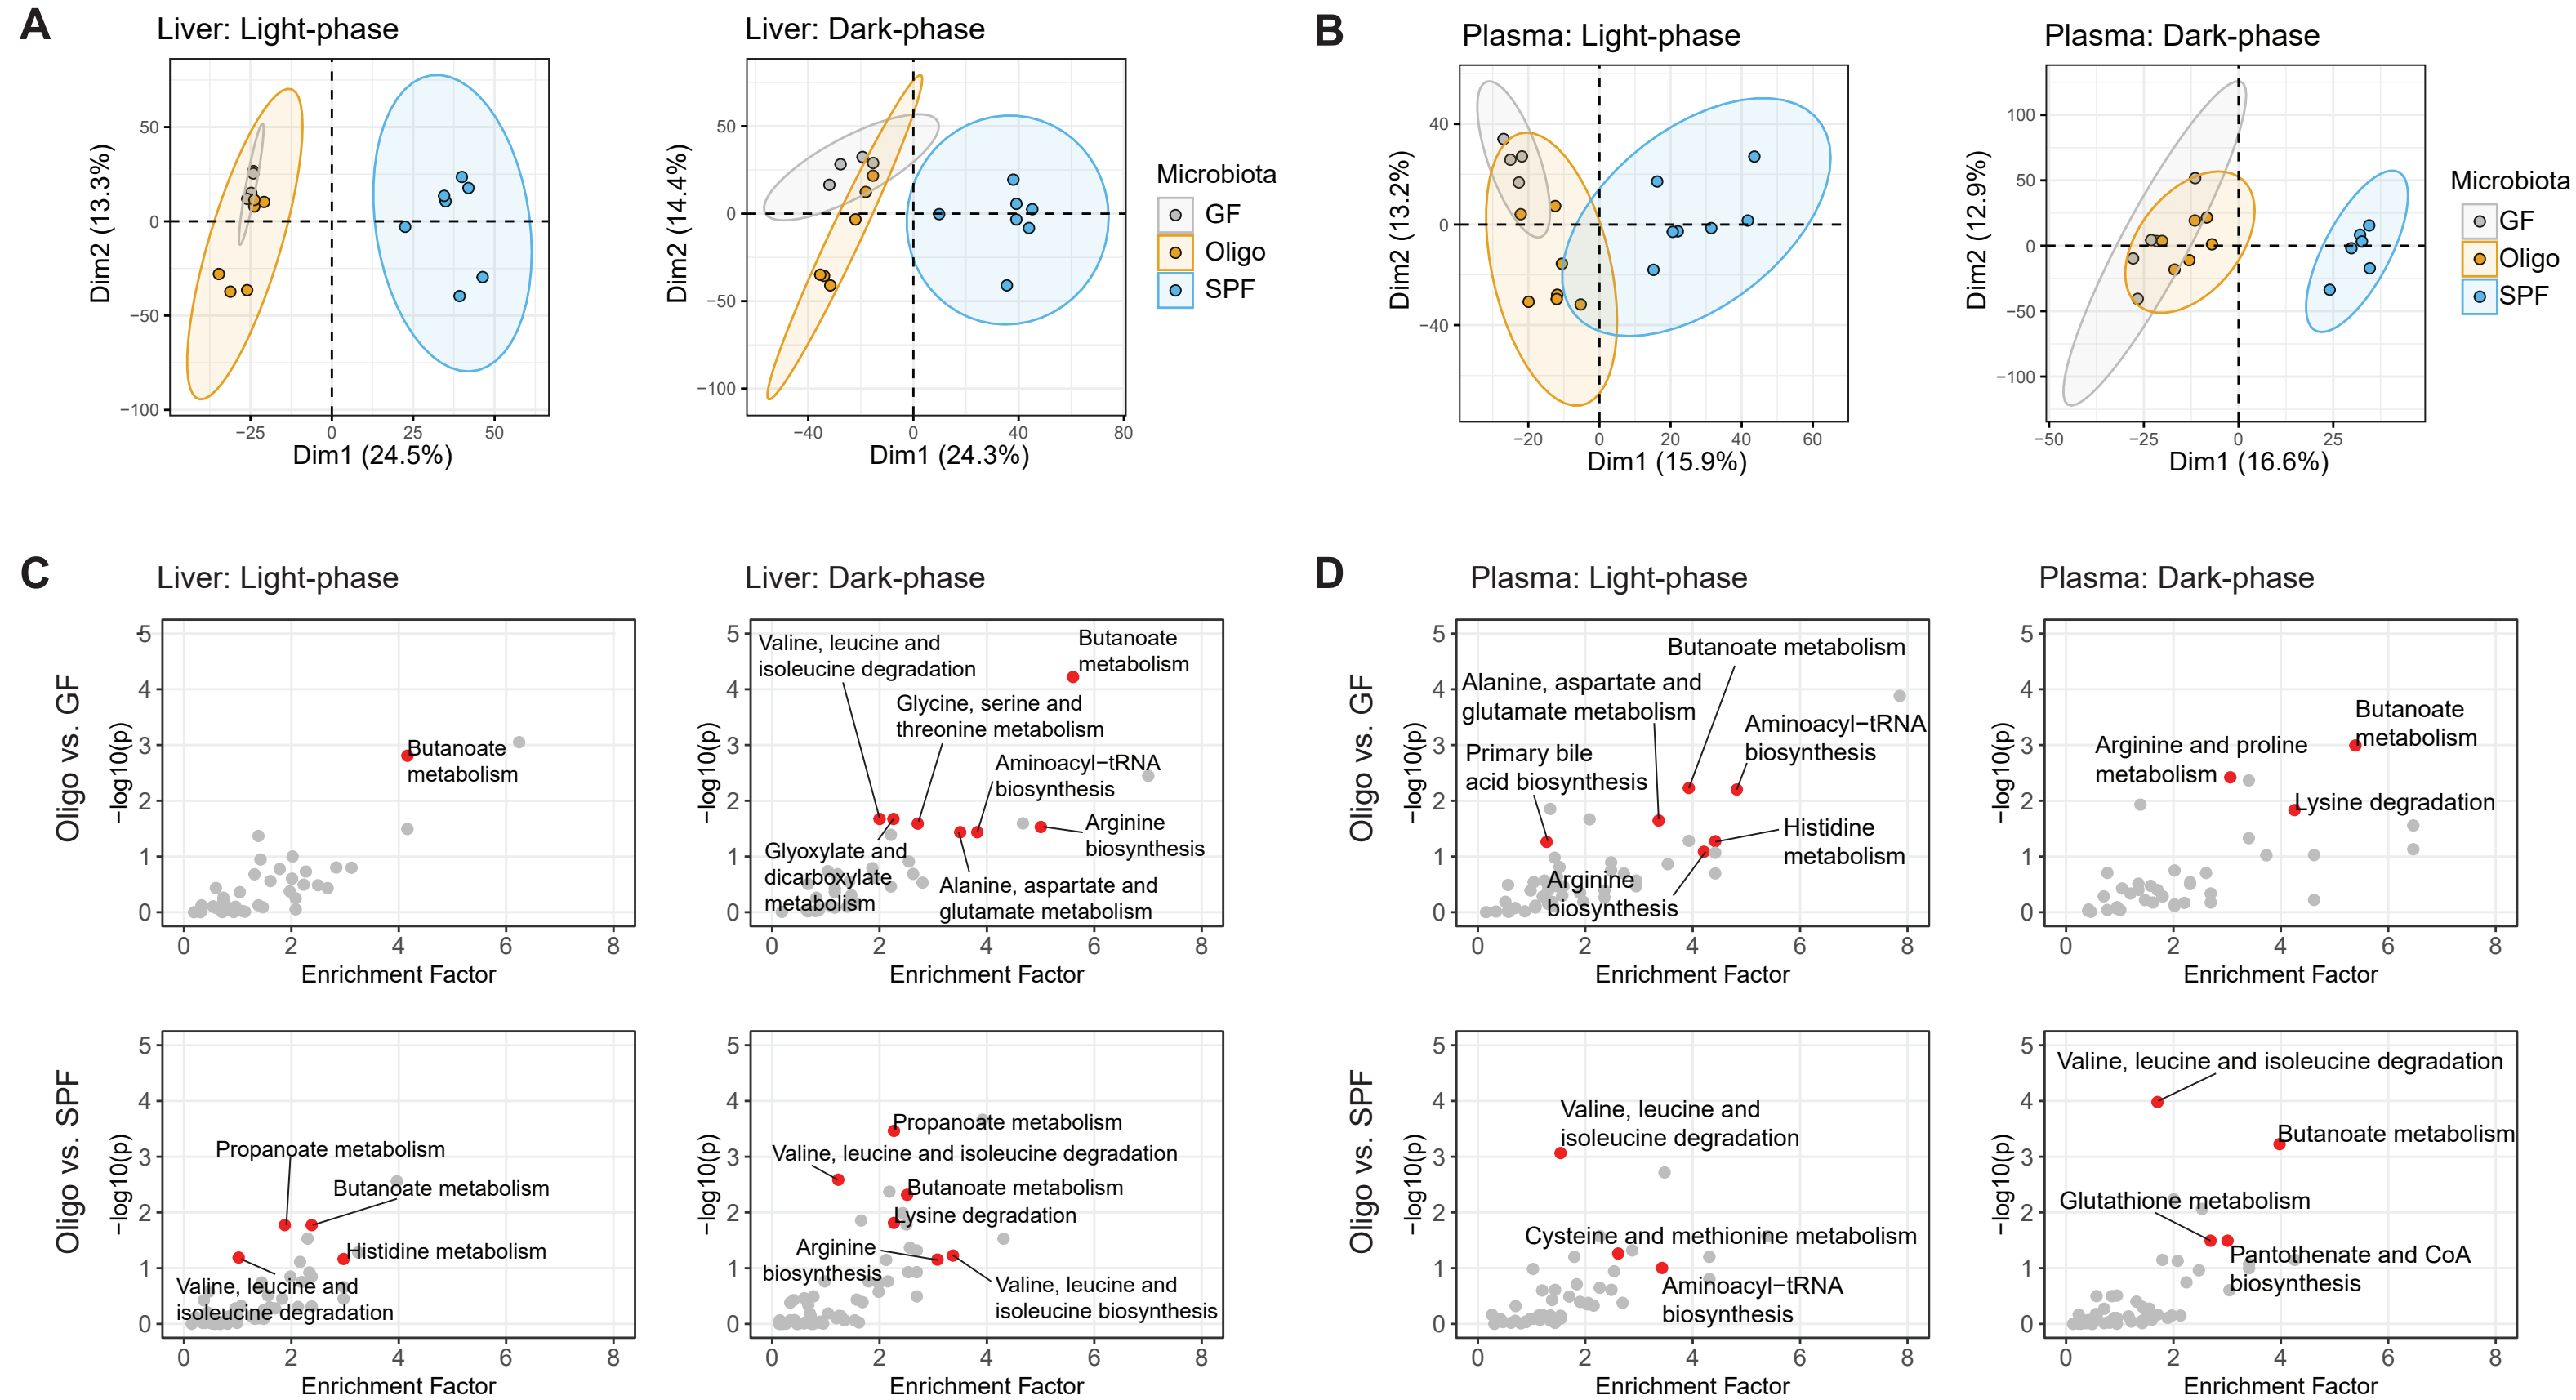

**Figure 4. Metabolic profile comparison of GF, OligoMM12 and SPF mice by UPLC/MS.**



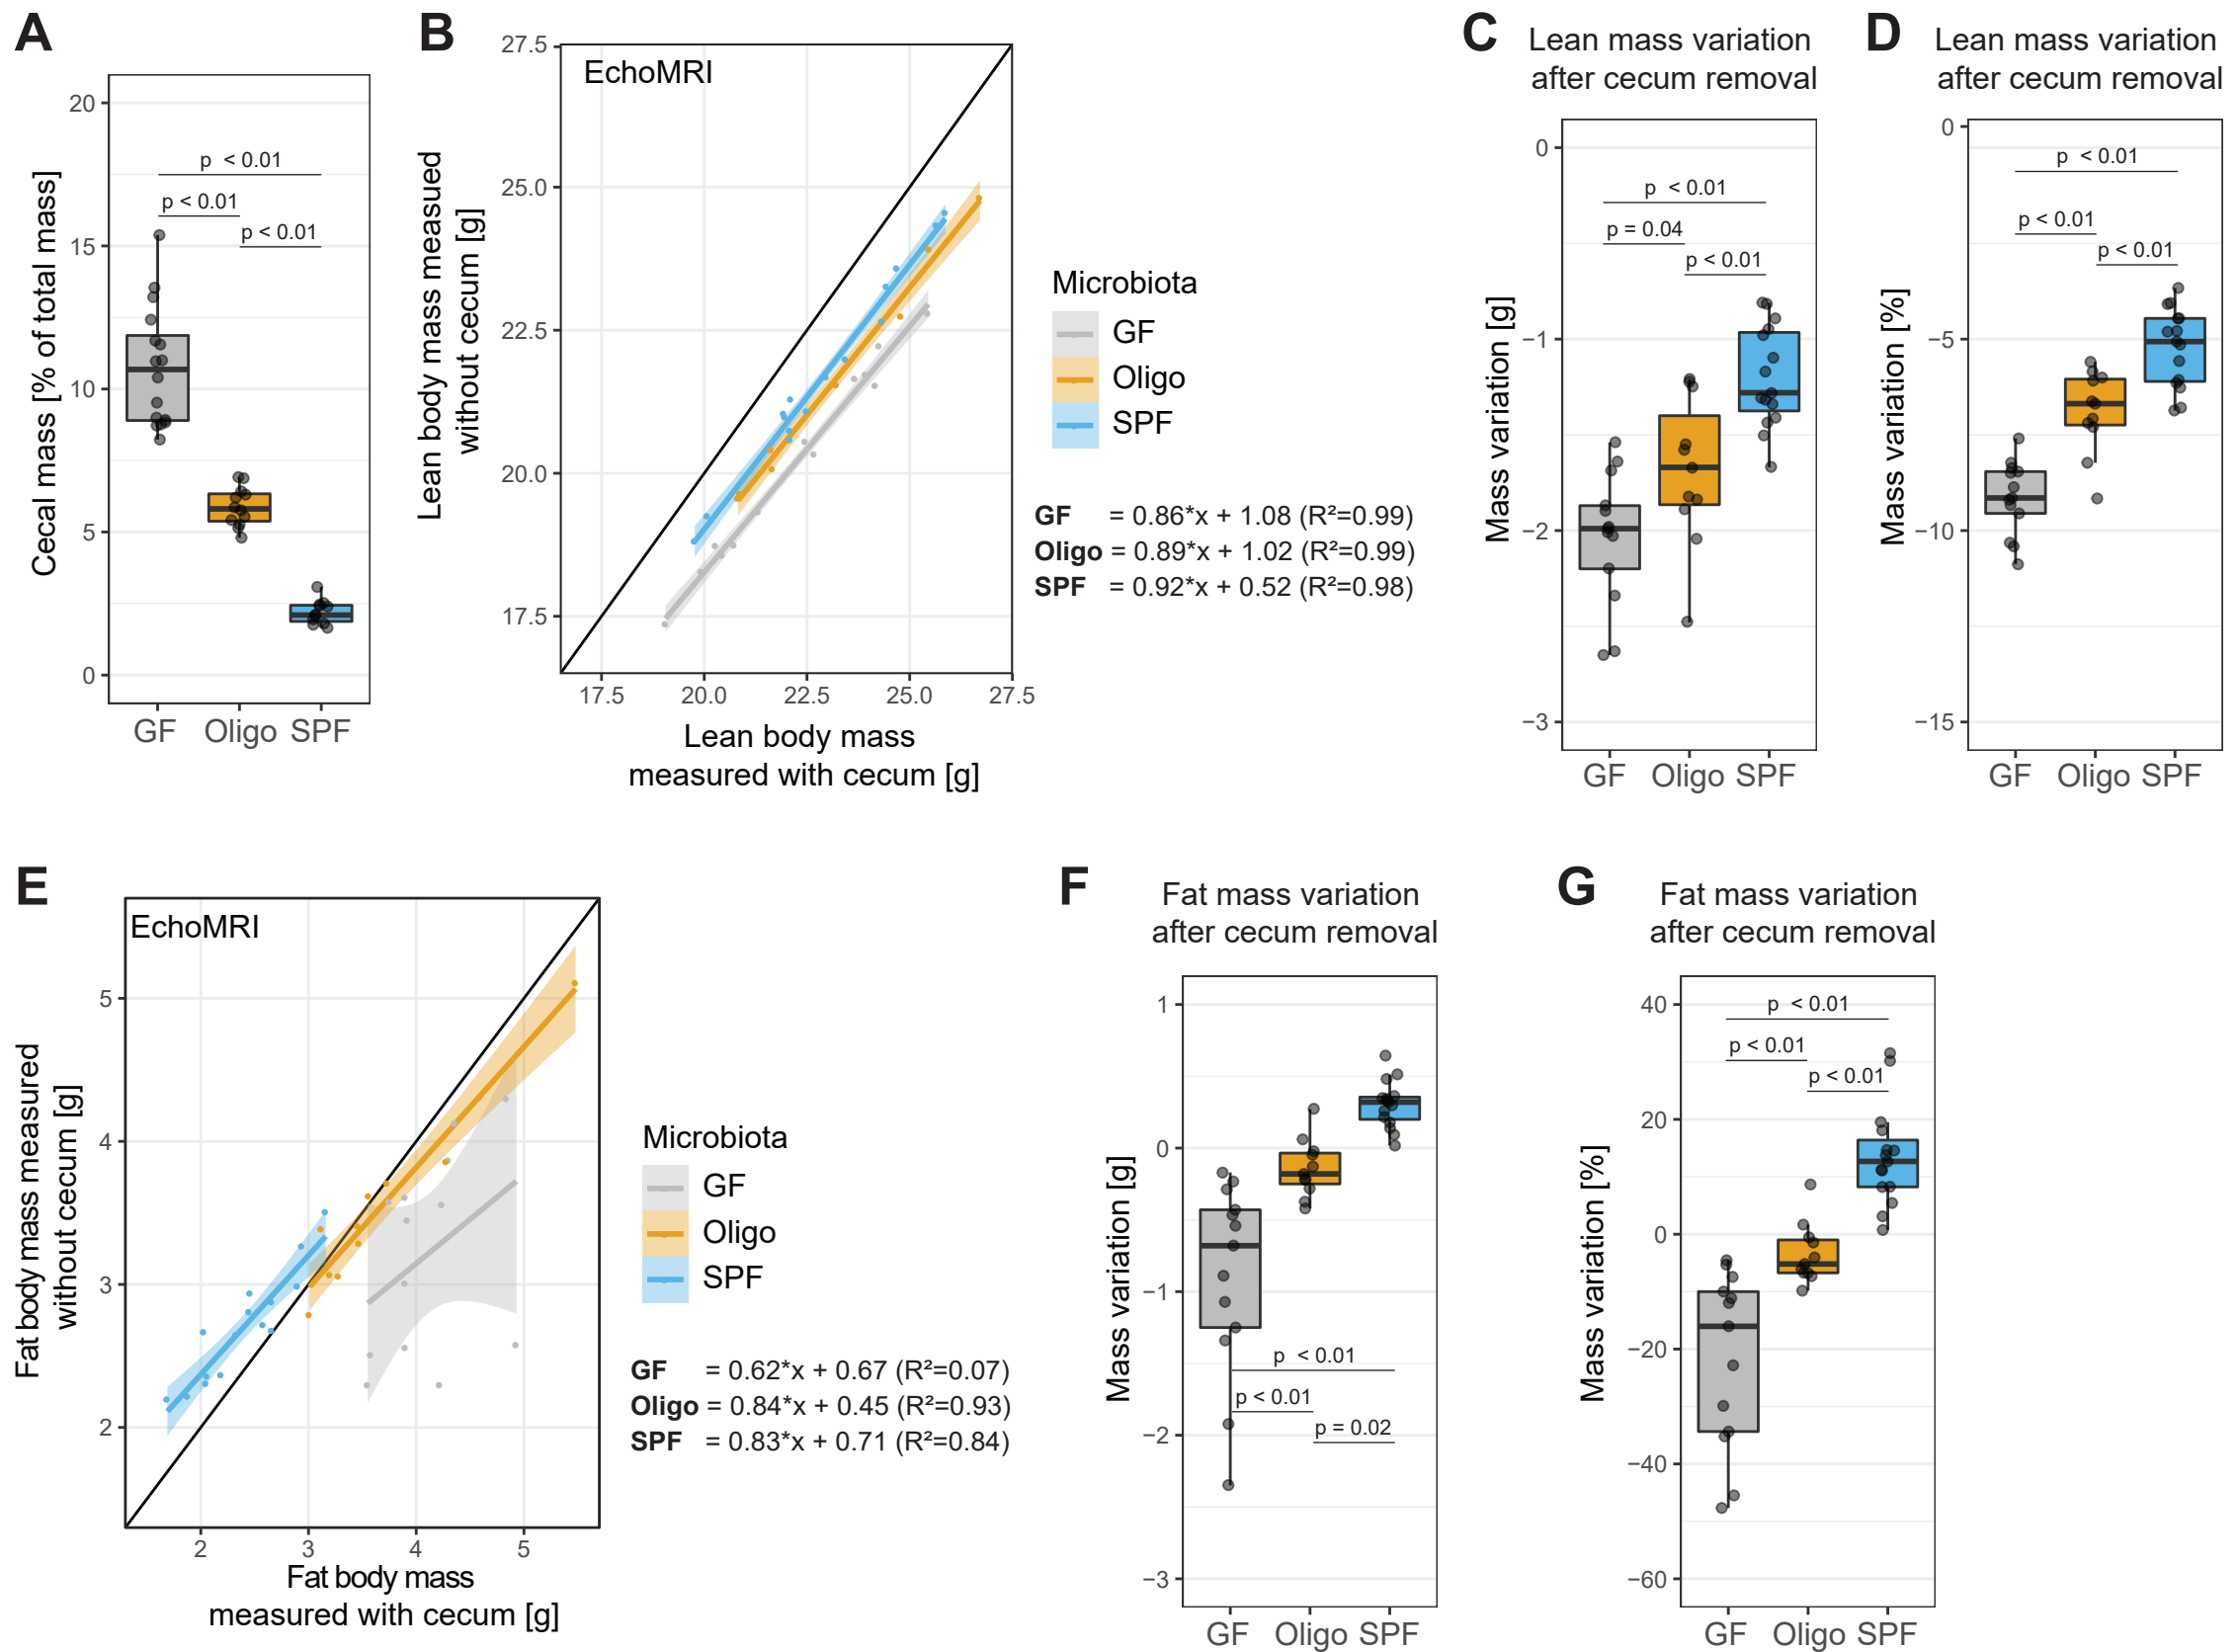

**Supplementary Figure 1: Cecal mass interferes with fat mass estimation by Echo-MRI.**

**A**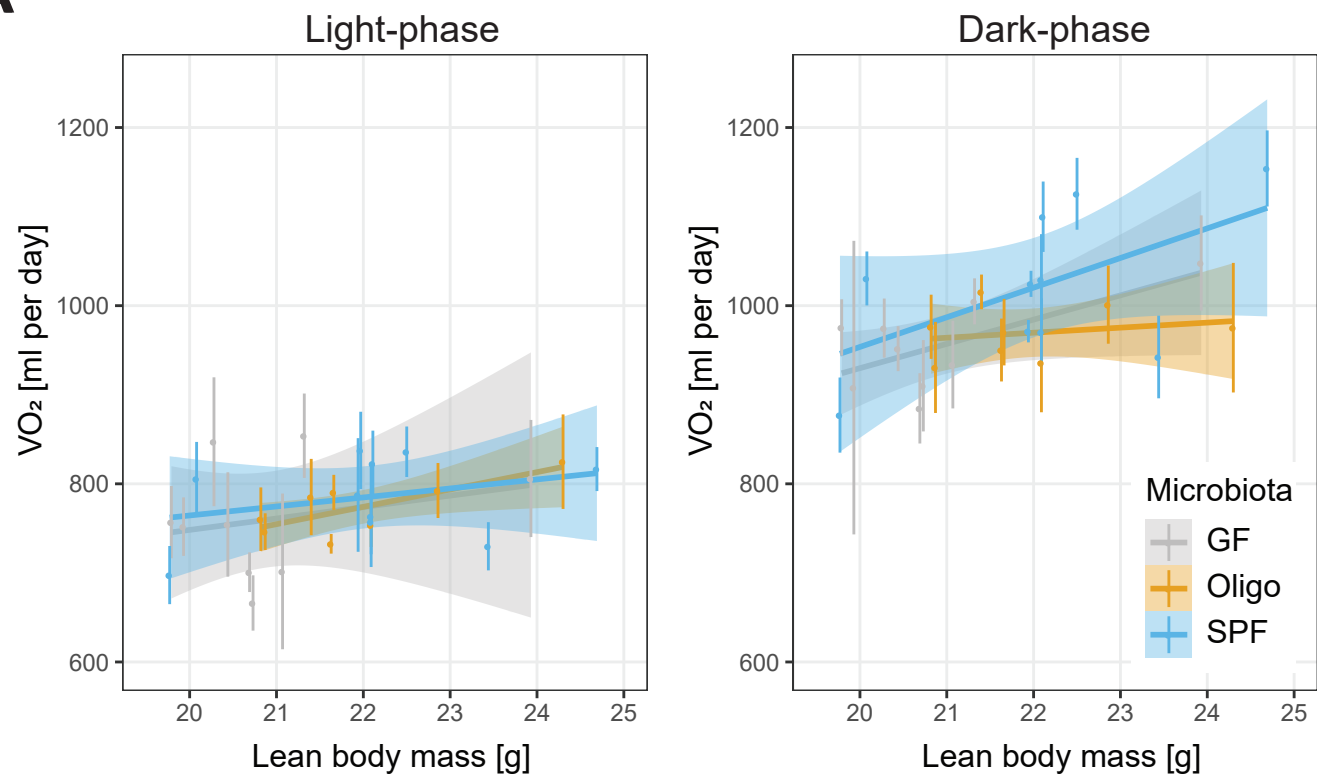**B**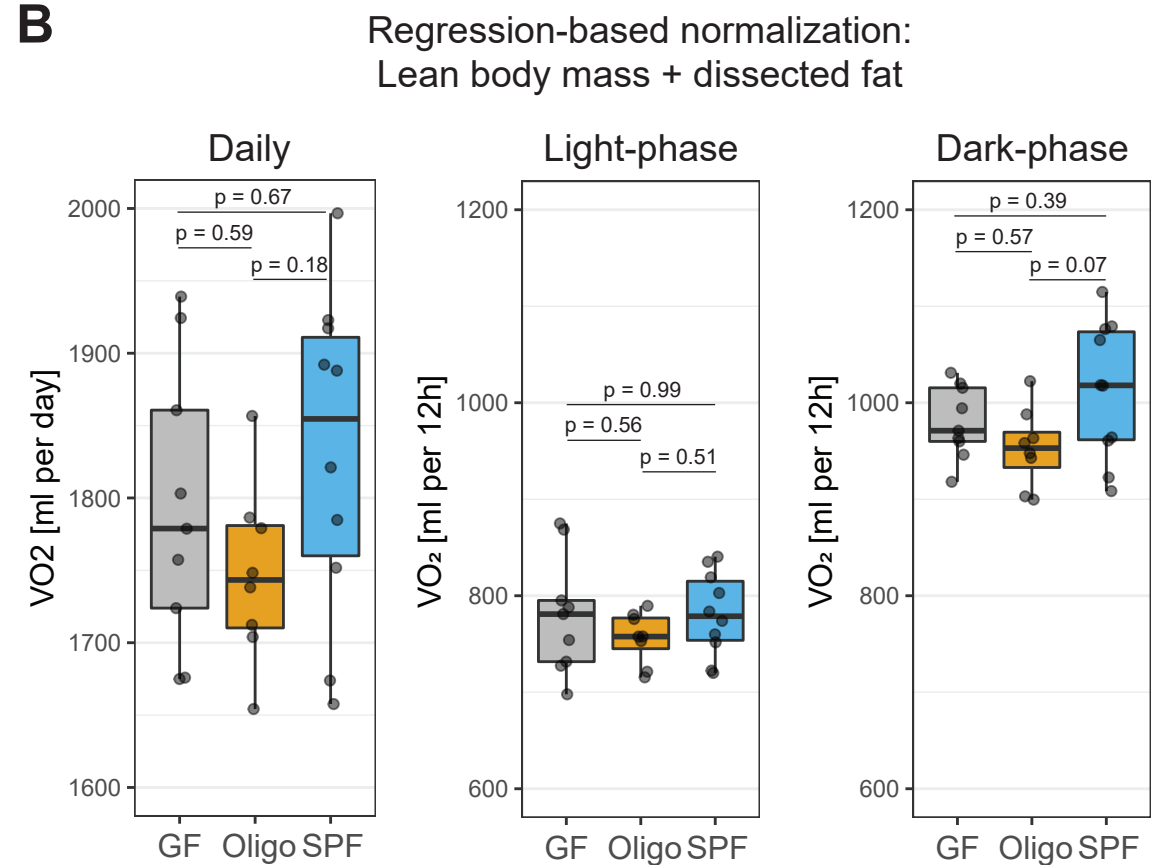**C**

Per mass normalization:  
Total body mass without cecum

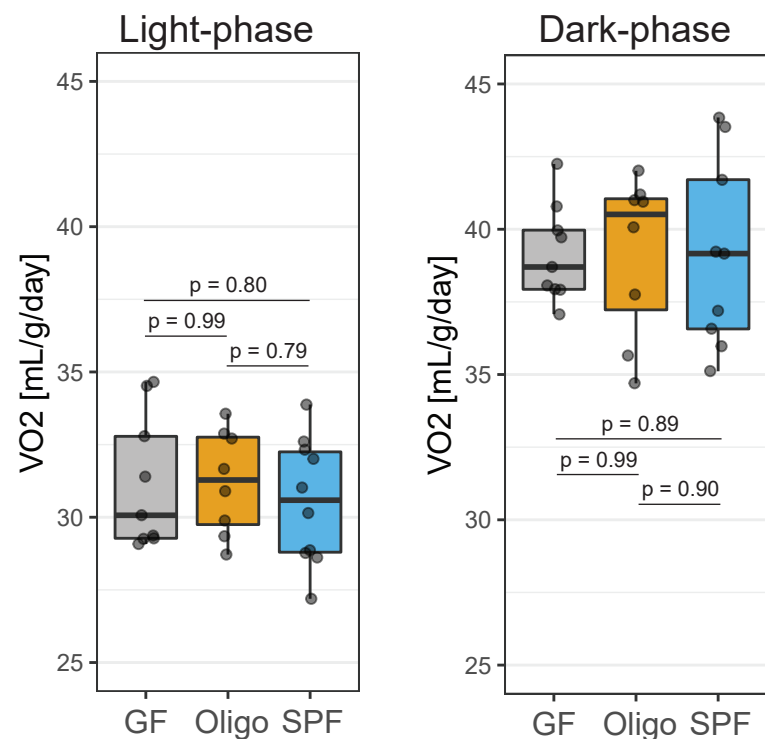**D**

Per mass normalization:  
Lean body mass

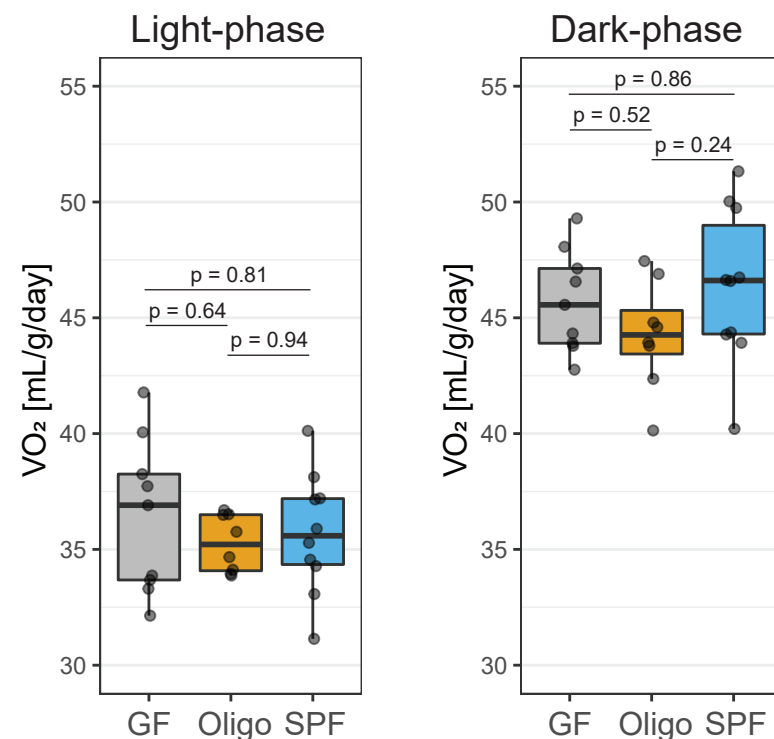**E**

Per mass normalization:  
Total body mass

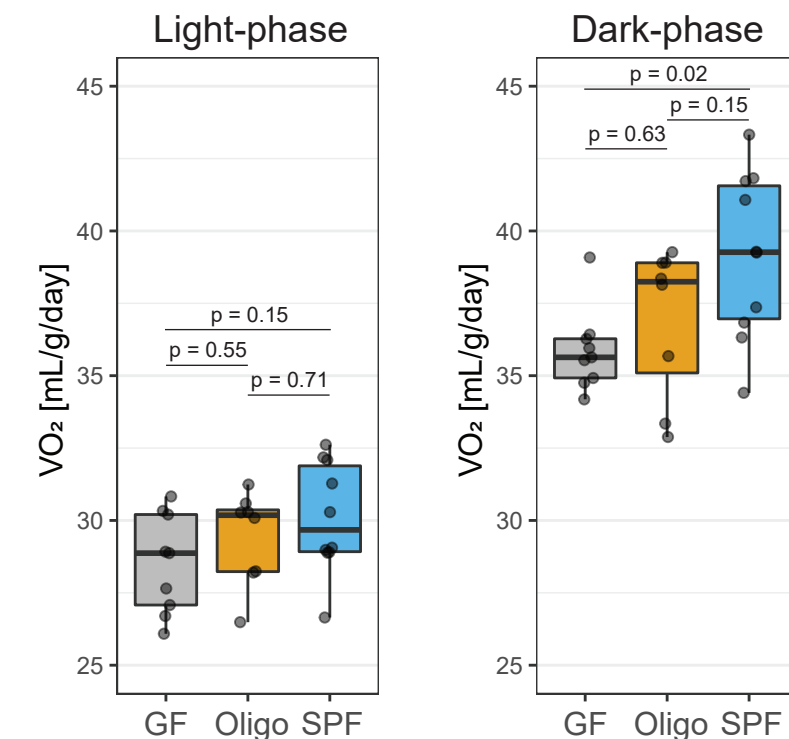

**Supplementary Figure 2: Cecal mass interferes with normalization of VO<sub>2</sub> and Energy Expenditure.**

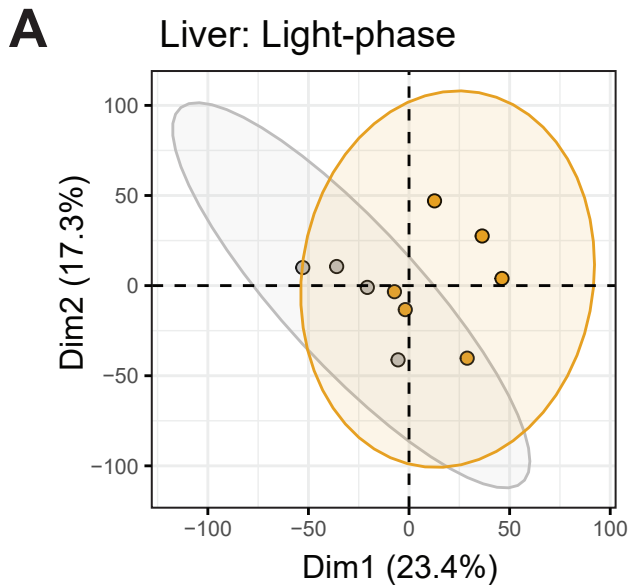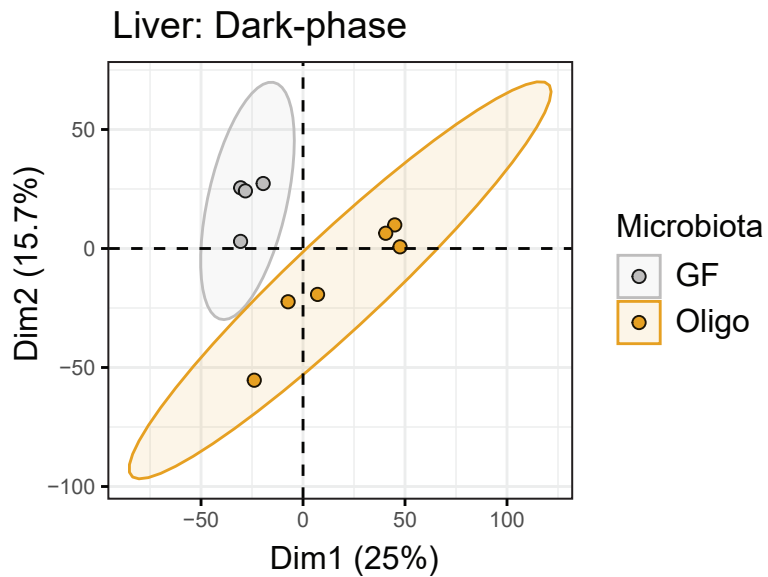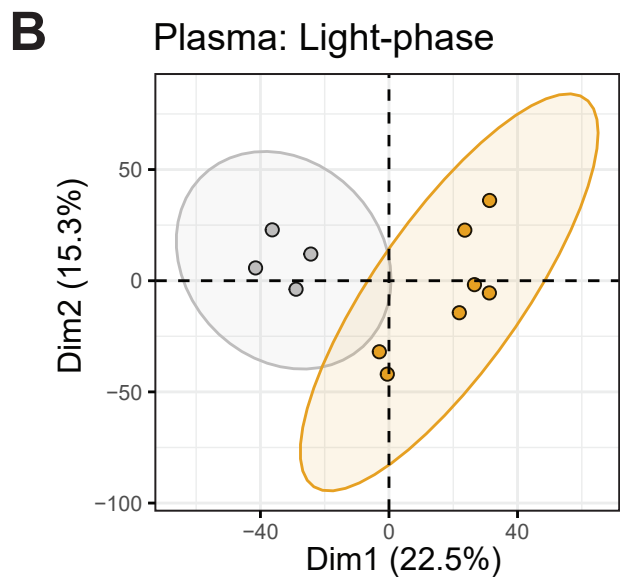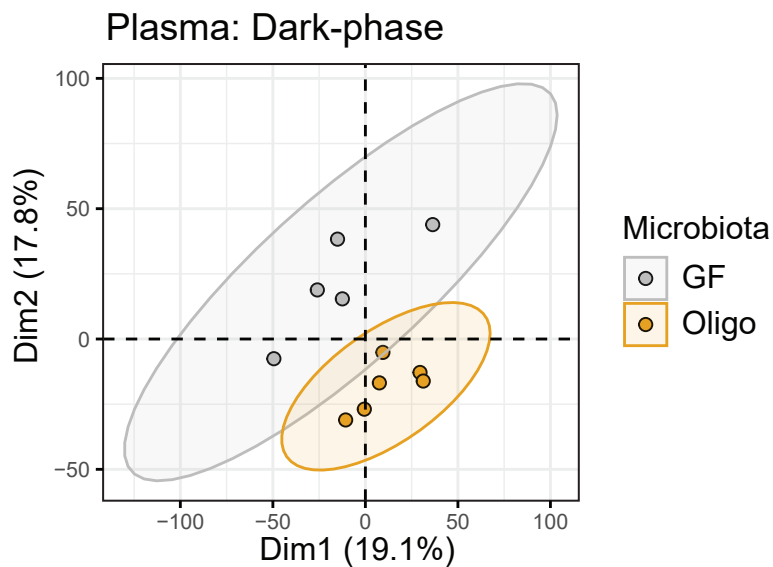

**Supplementary Figure 3. Metabolic profile comparison of GF and OligoMM12 C57BL/6 by UPLC/MS.**

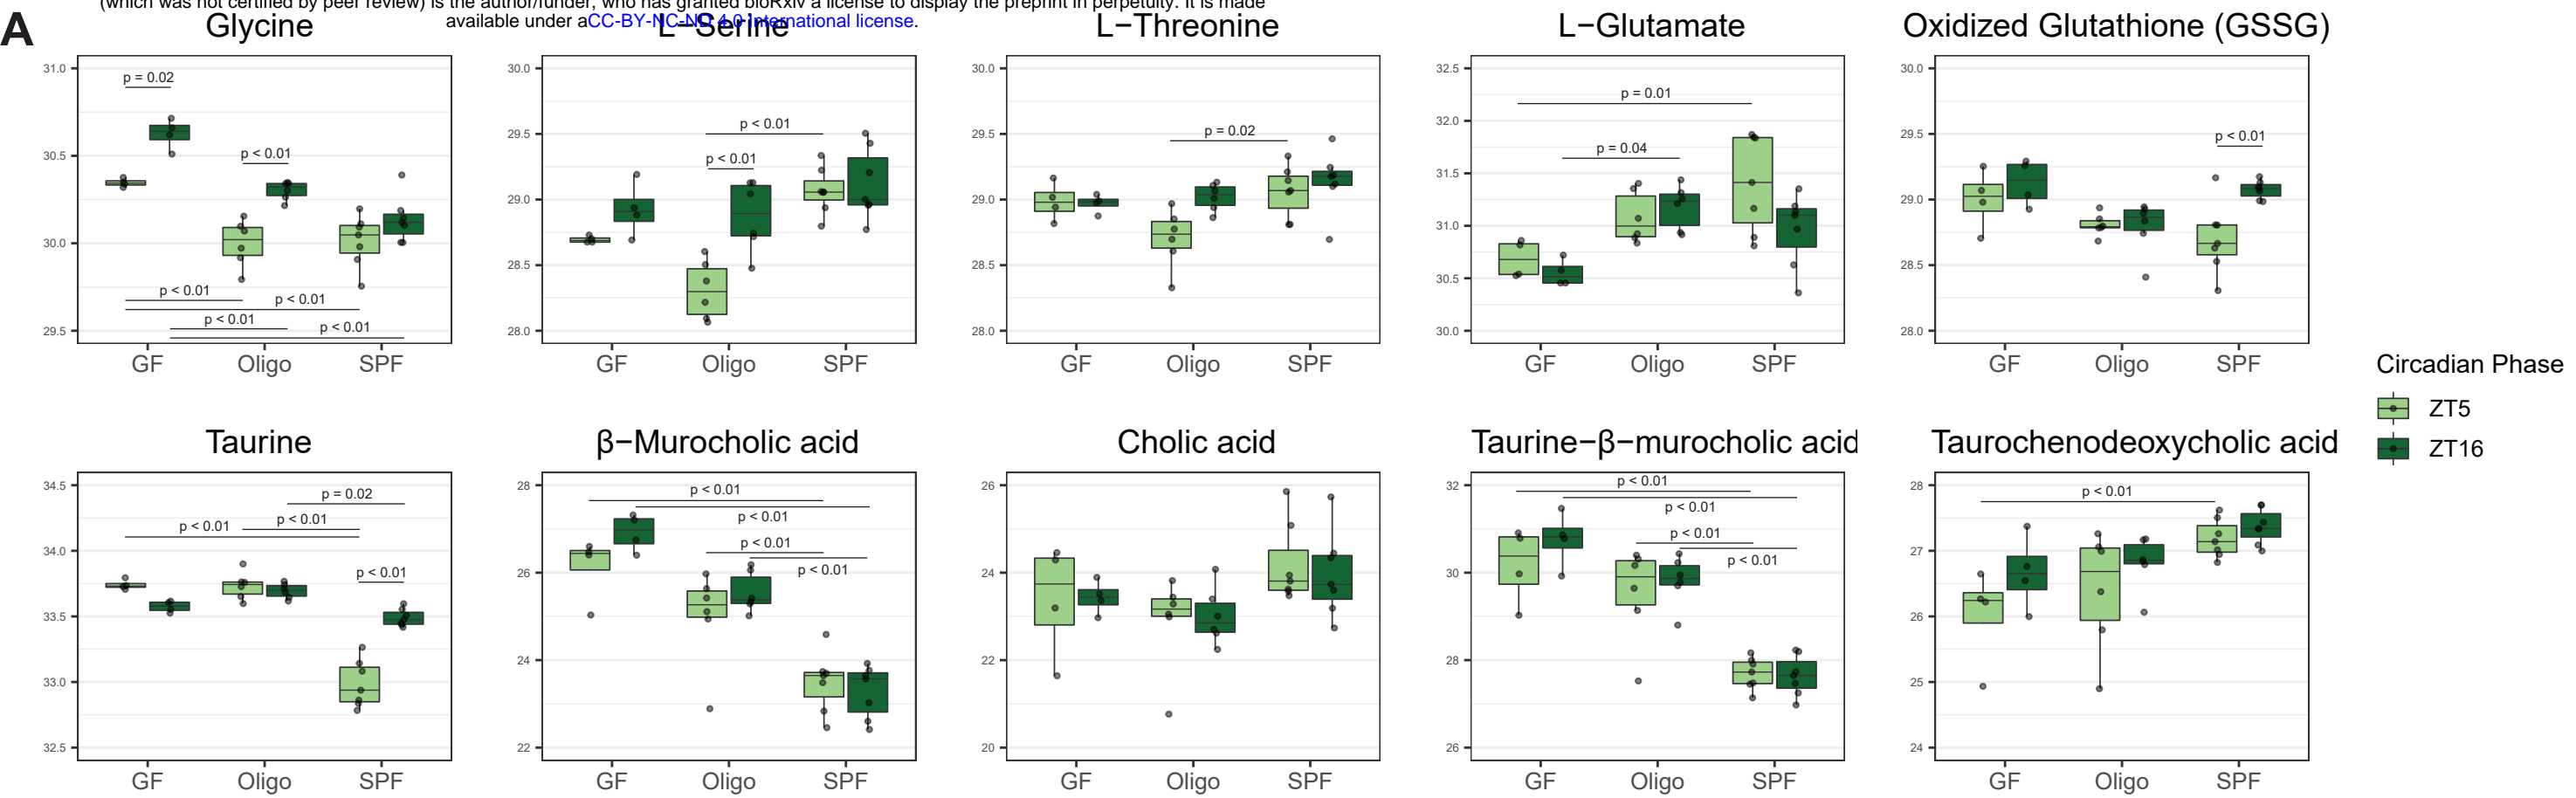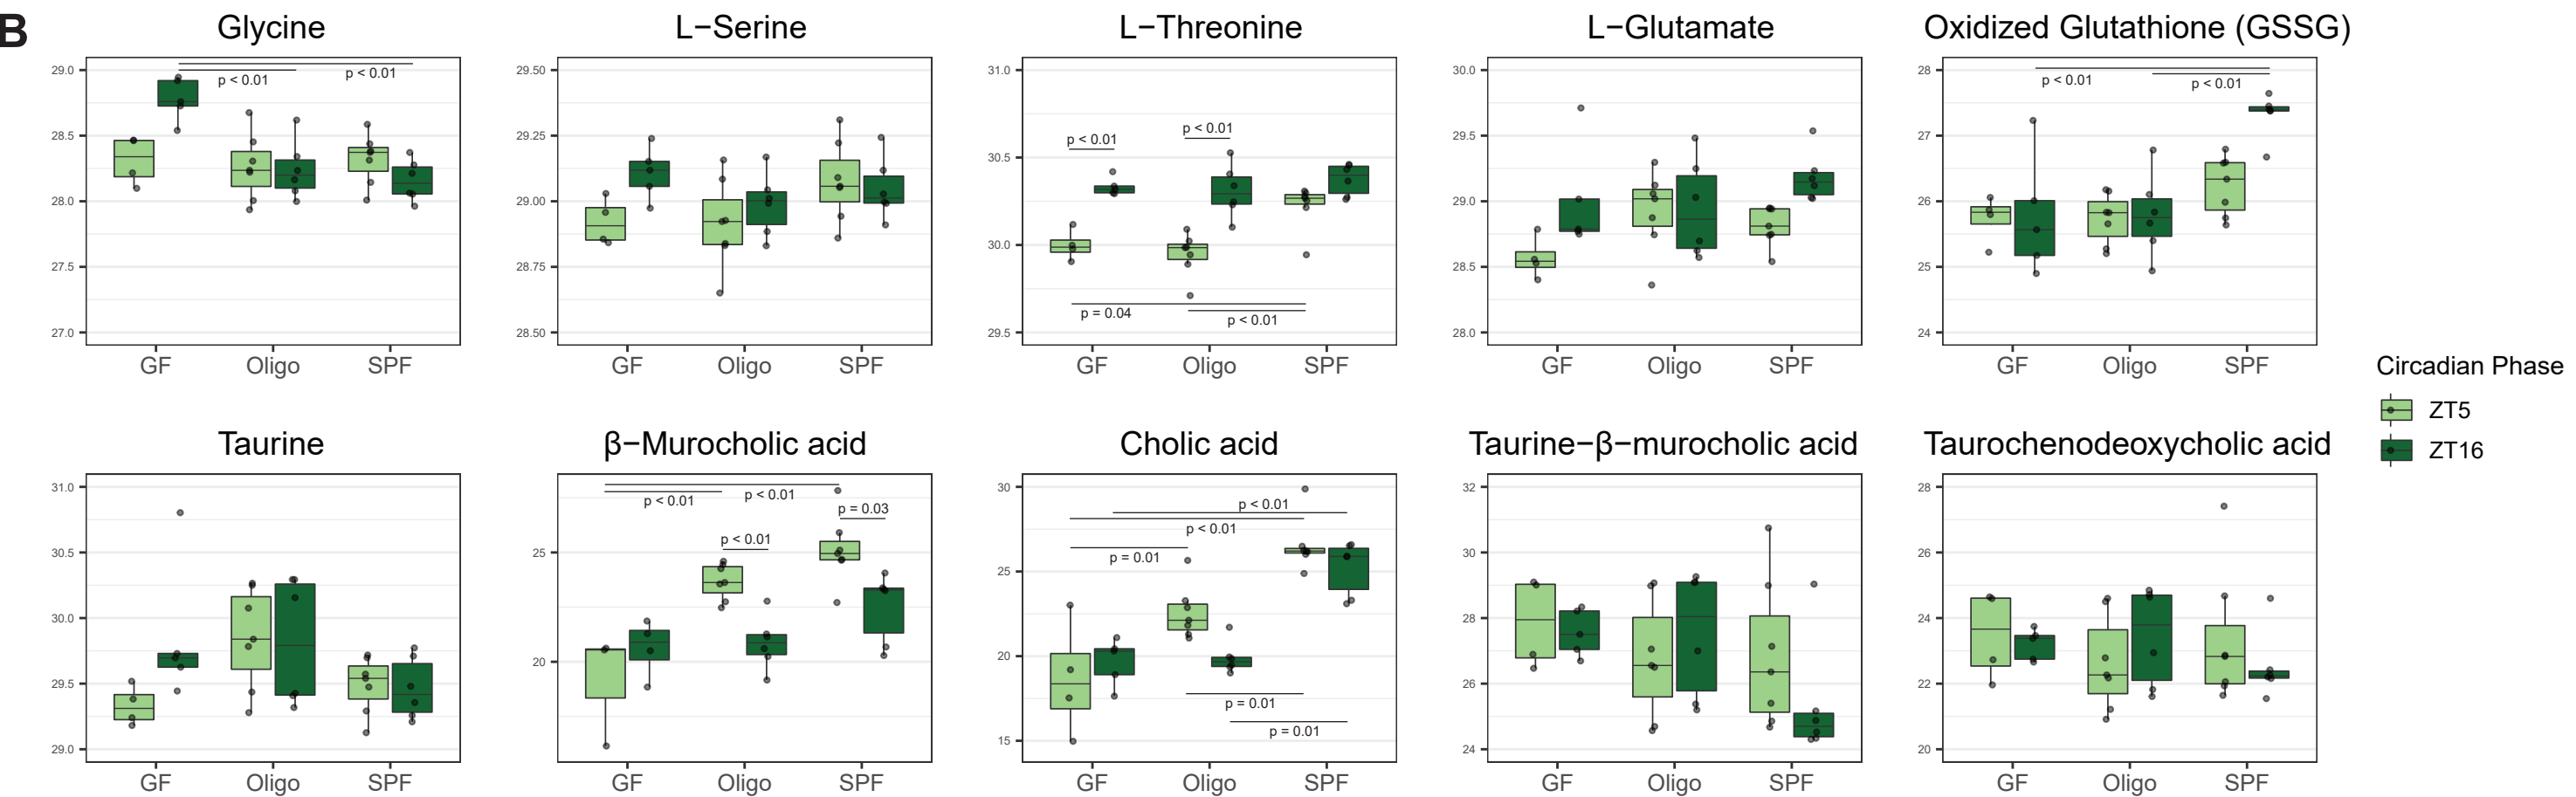

**Supplementary Figure 4. Metabolic profile comparison of GF, OligoMM12 and SPF mice by UPLC/MS (targeted peak extraction of selected list of compounds)**
